# Supplementary material for: Wheat Landrace Genome Diversity
Source: PubMed Central journal article supplement (PMC5378120; doi:10.1534/genetics.116.194688), 2017-02-16
Supplement: 1657FileS1.pdf [file 1657FileS1.pdf]

# Wheat Landrace Genome Diversity - Supplementary Material

Luzie U. Wingen<sup>\*,1</sup>, Claire West<sup>\*</sup>, Michelle Leverington-Waite<sup>\*</sup>, Sarah Collier<sup>\*</sup>, Simon Orford<sup>\*</sup>, Richard Goram<sup>\*</sup>,  
Cai-Yun Yang<sup>†</sup>, Julie King<sup>†</sup>, Alexandra M. Allen<sup>‡</sup>, Keith J. Edwards<sup>‡</sup> and Simon Griffiths<sup>\*</sup>

<sup>\*</sup>Crop Genetics, John Innes Centre, Norwich Research Park, Norwich, NR4 7UH, Norfolk, UK, <sup>†</sup>Division of Plant and Crop Sciences, School of Biosciences, University of Nottingham, Sutton Bonington, LE12 5RD, UK, <sup>‡</sup>School of Biological Sciences, University of Bristol, Bristol, UK

## Literature Cited

- Wang, S., D. Wong, K. Forrest, A. Allen, S. Chao, B. E. Huang, M. Maccaferri, S. Salvi, S. G. Milner, L. Cattivelli, A. M. Mastrangelo, A. Whan, S. Stephen, G. Barker, R. Wieseke, J. Plieske, I. W. G. S. Consortium, M. Lillemo, D. Mather, R. Appels, R. Dolferus, G. Brown-Guedira, A. Korol, A. R. Akhunova, C. Feuillet, J. Salse, M. Morgante, C. Pozniak, M.-C. Luo, J. Dvorak, M. Morell, J. Dubcovsky, M. Ganal, R. Tuberosa, C. Lawley, I. Mikoulitch, C. Cavanagh, K. J. Edwards, M. Hayden, and E. Akhunov, 2014 Characterization of polyploid wheat genomic diversity using a high-density 90 000 single nucleotide polymorphism array. *Plant Biotechnology Journal* **12**: 787–796.
- Wilhelm, E. P., R. M. Howells, N. Al-Kaff, J. Jia, C. Baker, M. A. Leverington-Waite, S. Griffiths, A. J. Greenland, M. I. Boulton, and W. Powell, 2013 Genetic characterization and mapping of the Rht-1 homoeologs and flanking sequences in wheat. *Theoretical and Applied Genetics* **126**: 1321–1336.
- Wingen, L., S. Orford, R. Goram, M. Leverington-Waite, L. Bilham, T. Patsiou, M. Ambrose, J. Dicks, and S. Griffiths, 2014 Establishing the a. e. watkins landrace cultivar collection as a resource for systematic gene discovery in bread wheat. *Theoretical and Applied Genetics* **127**: 1831–1842.

| acc code | country | accession name | comment                                                   | growth habit | ancestral group |
|----------|---------|----------------|-----------------------------------------------------------|--------------|-----------------|
| Par      | GBR     | Paragon        | PBI Cambridge; 1998 <sup>wp</sup>                         | S            | -               |
| CSp      | CHN     | Chinese Spring | Sichuan <sup>wp</sup>                                     | S            | -               |
| Gla      | FRA     | Glasgow        | Saaten Union; 2006 <sup>wp</sup>                          | W            | -               |
| Gar      | FRA     | Garcia         | SECOBRA; 2006 <sup>wp</sup>                               | W            | -               |
| Pam      | RUS     | Pamyati-Azieva | Sibirskii NIISKH; 2000 <sup>wp</sup>                      | S            | -               |
| Syn      | USA     | SS7010073      | E. Sears; synthetic hexaploid of <i>Triticum dicoccum</i> | W            | -               |

*x Aegilops tauschii* (Wilhelm *et al.* 2013)

doi: 10.1534/genetics.XXX.XXXXXX

Manuscript compiled: Sunday 25<sup>th</sup> December, 2016%

<sup>1</sup>Crop Genetics, John Innes Centre, Norwich Research Park, Norwich, NR4 7UH, Norfolk, UK phone: 0044-1603-450-508, luzie.wingen@jic.ac.uk

| acc code | country | accession name         | comment                                      | growth habit | ancestral group |
|----------|---------|------------------------|----------------------------------------------|--------------|-----------------|
| W007     | AUS     | -                      | -                                            | S            | 2.4             |
| W034     | IND     | Desi                   | Etawah, United Provinces; 27N 79E            | S            | 1.4             |
| W044     | MAR     | -                      | Granja Agricola, Quebdana, Melilla; 35N 3W   | S            | 2.4             |
| W079     | IND     | Dolatkhani (white)     | United Provinces                             | W            | 1.3/2.4         |
| W103     | ITA     | Gentil Rossa           | Flaksberger 19928                            | S            | 2.5             |
| W110     | FRA     | Carré Géant blanc      | -                                            | W            | 2.2             |
| W139     | FRA     | Bladette de Besplas    | -                                            | S            | 2.5             |
| W141     | CHN     | -                      | Mukden                                       | S            | 2.4             |
| W145     | ESP     | Aurora                 | Navarre                                      | S            | 2.4             |
| W199     | IND     | Boojri (bearded)       | Margnzani, Sibi, Baluchistan; 29N 68E        | S            | 1.4             |
| W209     | EGY     | Belardi 24B            | -                                            | S            | 1.3             |
| W219     | ESP     | -                      | Vallodolid district                          | S            | 2.4             |
| W224     | CHN     | Red wheat              | Tsinan district                              | S            | 2.4             |
| W238     | IRN     | -                      | Mehraban, N Hamadan; 36N 48E                 | S            | 1.4             |
| W254     | MAR     | -                      | Tazi, Kenitra; 34N 6W                        | S            | 2.5             |
| W273     | ESP     | -                      | Valverde del Camino, Huelva; 37N 6W          | S            | 1.3             |
| W281     | GRC     | Deve                   | Karditza + Trikkala districts of Thessalia   | S            | 1.3             |
| W292     | CYP     | Asprokoutsoullon       | Paphos district.                             | S            | 2.3             |
| W299     | TUR     | -                      | Seraikeuy                                    | S            | 1.3             |
| W300     | TUR     | -                      | Kirk Agach, 50 miles NE of Izmir; 39N 28E    | S            | 1.3             |
| W308     | IRN     | -                      | Rasht, Caspian shore; 38N 50E                | S            | 1.4             |
| W313     | BUR     | 2193/20-12             | S. Shan States (Imperial Institute)          | -            | 2.1             |
| W324     | CHN     | -                      | Yu Mao Grain Store, Hatamen Street, Peking   | W            | 1.4             |
| W352     | YUG     | -                      | Bugojno, Travnik, Bosnia; 44N 18E            | S            | 1.4             |
| W360     | YUG     | Veliko Hoce            | Veliko Hoce                                  | S            | 1.1             |
| W387     | ESP     | -                      | Minorca, southern part of Mahon; 40N 4E      | S            | 2.4             |
| W396     | PRT     | Trigo Rietti           | Golegã                                       | S            | 2.5             |
| W406     | IND     | Desi                   | Hasanganj, Unnao, United Provinces; 27N 81E  | S            | 1.3             |
| W433     | IND     | Soor Ghanum            | Musafirpur, Upper Zhob, Baluchistan; 32N 68E | S            | 1.4             |
| W440     | CHN     | -                      | -                                            | S            | 1.2             |
| W468     | AFG     | -                      | -                                            | S            | 2.2             |
| W471     | AFG     | -                      | -                                            | S            | 2.1             |
| W475     | AFG     | -                      | -                                            | S            | 1.4             |
| W483     | POL     | Surka Oscista          | -                                            | S            | 2.5             |
| W546     | ESP     | Hembrilla alto, fuerta | Navarre                                      | S            | 2.4             |
| W562     | GRC     | -                      | Tripolis district, Peloponese                | S            | 2.3             |
| W566     | GRC     | -                      | Pygros district, Peloponese                  | S            | 1.3             |
| W591     | PRT     | Trigo Anafil           | Frontiera                                    | S            | 1.3             |
| W624     | BGR     | Svalene                | Vetovo                                       | W            | 2.5             |
| W627     | IRN     | -                      | Asadabad, SW Hamadan; 34N 48E                | S            | 1.2             |
| W629     | IRN     | Qizilqin Boghda        | Hashdarud, Azerbaijan province; 40N 50E      | S            | 1.2             |
| W651     | CHN     | -                      | -                                            | W            | 2.3             |
| W652     | CHN     | -                      | -                                            | W            | 2.5             |

| acc code | country | accession name      | comment                           | growth habit | ancestral group |
|----------|---------|---------------------|-----------------------------------|--------------|-----------------|
| W670     | POL     | Zlotka Miczynskiego | -                                 | S            | 2.3             |
| W680     | ITA     | Grano locale        | Aquila                            | S            | 1.4             |
| W694     | IND     | Lyallpur 8A         | Punjab; 31N 74E                   | S            | 1.2             |
| W707     | IND     | Walaiti (Mastung)   | Panjpai, Shorarud, Baluchistan    | S            | 1.2             |
| W722     | CHN     | -                   | -                                 | S            | 2.2             |
| W729     | IRN     | Gandum-i-Jiruft     | Jiruft + Roodbar, Kerman; 30N 58E | S            | 1.4             |
| W731     | IND     | Kyo / Gahu (Nepali) | Sikkim; 27N 89E                   | S            | 1.4             |
| W740     | SUN     | -                   | Siberia                           | W            | 2.3             |
| W777     | FIN     | -                   | -                                 | S            | 1.2             |
| W784     | ITA     | Oberdan             | Royal Exp. Sta. Rieti             | S            | 1.2             |
| W811     | TUN     | -                   | Maison Carree                     | S            | 1.2             |
| W827     | CHN     | -                   | Shanghai (Tsao-Ka-Doo)            | S            | 1.2             |

**Table S 1 List of accessions and background information.** Watkins hexaploid wheat landrace collection accession codes are indicated by 'W' followed by a three digit number. Replace 'W' by 'WAT 1190' for the original code. Country, accession name and comments on Watkins accession received from [www.seedstor.ac.uk](http://www.seedstor.ac.uk); <sup>wp</sup> from [wheatpedigree.net](http://wheatpedigree.net); growth habit from spring trials 2010 ([Wingen et al. 2014](#)), S = spring type, W = winter type; ancestral groups from [Wingen et al. \(2014\)](#): 1.1.East-Europe-North-Asia (former USSR), 1.2.China-India, 1.3.Centr-East-Asia, 1.4.Europe-Asia, 2.1.South-Europe-Asia, 2.2.North-Asia, 2.3.East-Europe, 2.4.South-Mediterranean-Africa, 2.5.North-Mediterranean.

| Chr  | Marker number | Map Length [cM] |        |        | MDR to LRC |       | MCR to LRC |           | MCR            |
|------|---------------|-----------------|--------|--------|------------|-------|------------|-----------|----------------|
|      | LRC           | LRC             | AvaCad | Wang   | AvaCad     | Wang  | AvaCad     | Wang      | AvaCad to Wang |
| 1A   | 142           | 97.4            | 109.4  | 161.4  | 1.64       | 1.46  | 0.92 (79)  | 0.94 (52) | 0.86 (51)      |
| 1B   | 227           | 100.0           | 178.2  | 174.1  | 1.64       | 1.70  | 0.93 (176) | 0.98 (87) | 0.92 (133)     |
| 1D   | 111           | 76.5            | 125.4  | 209.1  | 1.57       | 2.08  | 0.76 (54)  | 0.84 (33) | 0.72 (204)     |
| 2A   | 137           | 113.3           | 233.8  | 185.5  | 1.68       | 1.39  | 0.94 (77)  | 0.99 (45) | 0.97 (42)      |
| 2B   | 172           | 113.2           | 141.5  | 188.9  | 1.25       | 1.53  | 0.85 (123) | 0.91 (56) | 0.91 (66)      |
| 2D   | 101           | 114.5           | 194.3  | 152.8  | 1.17       | 0.79  | 0.72 (58)  | 0.90 (32) | 0.35 (100)     |
| 3A   | 118           | 115.4           | 183.2  | 207.3  | 1.77       | 1.63  | 0.93 (86)  | 0.99 (48) | 0.97 (65)      |
| 3B   | 172           | 134.9           | 240.5  | 156.1  | 1.76       | 1.10  | 0.66 (136) | 0.83 (72) | 0.74 (93)      |
| 3D   | 18            | 16.9            | 116.1  | 166.2  | 7.94       | 9.27  | 0.77 (11)  | 0.90 (5)  | 0.89 (20)      |
| 4A   | 94            | 123.3           | 156.8  | 166.7  | 1.16       | 1.09  | 0.96 (75)  | 0.94 (32) | 0.97 (41)      |
| 4B   | 95            | 102.9           | 111.2  | 123.0  | 2.16       | 1.10  | 0.97 (78)  | 0.97 (46) | 0.97 (61)      |
| 4D   | 20            | 37.3            | 123.7  | 170.4  | 2.63       | 10.99 | 0.69 (12)  | 0.75 (10) | 0.87 (10)      |
| 5A   | 146           | 104.0           | 203.7  | 148.5  | 1.98       | 1.51  | 0.96 (92)  | 0.94 (57) | 0.99 (55)      |
| 5B   | 199           | 118.1           | 264.8  | 219.8  | 2.95       | 1.99  | 0.78 (157) | 0.93 (67) | 0.90 (93)      |
| 5D   | 79            | 47.5            | 108.1  | 224.0  | 1.72       | 4.32  | 0.40 (42)  | 0.84 (17) | 0.51 (67)      |
| 6A   | 171           | 85.2            | 166.4  | 183.4  | 1.88       | 3.19  | 0.86 (142) | 0.96 (62) | 0.75 (85)      |
| 6B   | 156           | 93.5            | 136.7  | 127.5  | 1.43       | 1.37  | 0.97 (110) | 0.95 (58) | 0.93 (72)      |
| 6D   | 38            | 19.3            | 78.5   | 161.8  | 4.34       | 12.54 | 0.79 (10)  | 0.50 (4)  | 0.74 (23)      |
| 7A   | 143           | 128.5           | 219.0  | 244.2  | 1.52       | 1.66  | 0.99 (112) | 0.98 (44) | 0.98 (56)      |
| 7B   | 101           | 79.0            | 74.1   | 188.6  | 1.10       | 1.82  | 0.91 (63)  | 0.98 (45) | 0.98 (36)      |
| 7D   | 58            | 41.4            | 147.0  | 241.3  | 2.77       | 4.48  | 0.69 (28)  | 0.52 (12) | 0.91 (30)      |
| sum  | 2498          | 1862.1          | 3312.4 | 3800.6 | -          | -     | -          | -         | -              |
| mean | 119           | 88.7            | 157.7  | 181.0  | 2.2        | 3.2   | 0.83       | 0.88      | 0.85           |

**Table S 2 Characteristics of the landrace consensus map (LRC) LGs.** Comparison of LG lengths, marker distance ratios and marker correlation ratios to the AvaCad map ([www.cerealsdb.uk.net](http://www.cerealsdb.uk.net)) and the Wang (Wang *et al.* 2014) map are given. Number of markers in common between maps compared are given in brackets. Mean distance ratios over 2.0 are highlighted by a red shading of the cell. Marker order correlation values under 0.8 are highlighted by a blue shading of the cell. .

| Map     | Number of markers | Mean Marker Distance Ratio | Chromosome | Correlation with LRC |
|---------|-------------------|----------------------------|------------|----------------------|
| ParGar  | 7                 | 2.70                       | 1D         | 0.79                 |
| ParW273 | 10                | 2.16                       | 1D         | 0.99                 |
| ParW313 | 8                 | 3.90                       | 1D         | -0.50                |
| ParW281 | 11                | 1.85                       | 2A         | 0.22                 |
| ParW313 | 10                | 3.58                       | 2B         | -0.03                |
| ParW141 | 8                 | 1.85                       | 2B         | 1.00                 |
| ParW313 | 10                | 1.94                       | 2D         | -0.30                |
| ParW209 | 32                | 1.83                       | 3B         | 0.99                 |
| ParW281 | 18                | 1.97                       | 3B         | 0.35                 |
| ParW313 | 11                | 1.83                       | 3B         | 0.45                 |
| ParW433 | 12                | 4.64                       | 3B         | 0.61                 |
| ParW007 | 10                | 1.75                       | 3B         | 1.00                 |
| ParW468 | 25                | 2.09                       | 5A         | 0.98                 |
| ParW281 | 16                | 2.51                       | 5B         | 0.23                 |
| ParW139 | 7                 | 2.84                       | 5D         | 1.00                 |
| ParW281 | 9                 | 2.19                       | 6B         | -0.10                |
| ParW299 | 9                 | 24.39                      | 6D         | 0.17                 |
| ParW313 | 11                | 1.85                       | 7A         | 0.91                 |
| ParSyn  | 23                | 2.61                       | 7B         | 1.00                 |
| ParW624 | 8                 | 2.09                       | 7B         | 0.24                 |

**Table S 3** List of bi-parental LGs with expanded marker distances as revealed by larger MDR in comparison to the LRC map.

| Chromosome | Number of times<br>poor correlation | Number of LGs<br>with > 6 markers |
|------------|-------------------------------------|-----------------------------------|
| 6B         | 7                                   | 50                                |
| 2A         | 6                                   | 59                                |
| 5A         | 5                                   | 59                                |
| 5D         | 5                                   | 24                                |
| 6A         | 5                                   | 61                                |
| 1B         | 4                                   | 53                                |
| 2B         | 4                                   | 57                                |
| 1A         | 3                                   | 39                                |
| 3A         | 3                                   | 53                                |
| 3B         | 3                                   | 58                                |
| 7B         | 3                                   | 41                                |
| 1D         | 2                                   | 35                                |
| 2D         | 2                                   | 48                                |
| 4A         | 2                                   | 40                                |
| 5B         | 2                                   | 56                                |
| 6D         | 2                                   | 2                                 |
| 7D         | 2                                   | 9                                 |
| 7A         | 1                                   | 60                                |
| 3D         | 0                                   | 4                                 |
| 4B         | 0                                   | 20                                |
| 4D         | 0                                   | 1                                 |

**Table S 4 Numbers of bi-parental LGs per chromosome that are incongruent with the LRC map** The number of bi-parental population LGs that have a poor correlation to the respective LRC LG as measured by Spearman's rank correlation of marker order. Also, the number of LGs which were included in the analysis are given.



| Accession | Translocations detected in      |                                                             |           | Comment on GISH                        |
|-----------|---------------------------------|-------------------------------------------------------------|-----------|----------------------------------------|
|           | genetic map                     | estRF (LOD, no of markers)                                  | GISH      |                                        |
| W103      | BS00097307_2A at 80cM end of 2D | -                                                           | TA/B:D    | detected                               |
|           | -                               | T5B:7B (7, 8)                                               | -         | TB:B not visible                       |
|           | -                               | T2A:3A (7, 3)                                               | -         | TA:A not visible                       |
| W139      | BS00077039_6A at 0cM of 1D      | -                                                           | TA:D      | detected                               |
|           | -                               | T1B:1D (18, 5)                                              | -         | not detected; maybe complex 1D events? |
| W308      | -                               | T3B:5A (22, 8)<br>5A 0-19cMs link to 3B 24-43cMs            | TA:B      | detected                               |
|           | -                               | T4B:5B (21, 8)                                              | -         | TB:B not visible                       |
| W360      | -                               | T5D:6B (6, 1)                                               | -         | not detected; below threshold?         |
|           | -                               | -                                                           | missing B |                                        |
| W468      | -                               | T5A:5B (22, 2)<br>single 5B marker in middle of 5A at 70cM  | -         | not detected; too short?               |
| W546      | -                               | several (< 6)                                               | -         | not detected; below threshold?         |
| W624      | -                               | T1D:6B (8, 1)<br>4B (0-6cM) linked to 6D (35-39cM)          | TA/B:D    | detected                               |
| W680      | -                               | T5D:6B (10, 1)<br>BS00009821-BS00022937 link                | TA/B:D    | detected                               |
| W740      | -                               | T5B:5D (21, 3)<br>BS00022999_5B(0cM)-<br>IS00037384_5D(0cM) | TD:B      | detected                               |
| W827      | T5B:7B                          | -                                                           | -         | TB:B not visible                       |
|           | -                               | T1B:6B (9, 8)                                               | -         | TB:B not visible                       |

**Table S 6 Comparison of translocations detected by mapping, predicted by estRF analysis and detected by GISH.**

Ten accessions were tested. In cases where the translocation was short it was not always possible to discriminate the color in the GISH and thus there is some ambiguity if translocations came from the A or from the B genome. Abbreviations: T = Translocation, TA/B:D = Translocation of either A or B with D.



| acc   | 1A:            |    |    |    |    | 1B: |    |    |    | 1D: |    |    |    | 2A: |    |    |    | 2B: |    |    | 2D: | 3A: | 3B: |    |    |    | 4A: | 4B: | 4D: | 5A: | 5B: | 5D: | 6A: | 6B: | 7A: | acc |     |   |   |   |   |   |     |
|-------|----------------|----|----|----|----|-----|----|----|----|-----|----|----|----|-----|----|----|----|-----|----|----|-----|-----|-----|----|----|----|-----|-----|-----|-----|-----|-----|-----|-----|-----|-----|-----|---|---|---|---|---|-----|
| name  | 1B             | 1D | 6A | 6D | 7B | 1D  | 2B | 5B | 6B | 5D  | 6A | 6B | 6D | 7D  | 2B | 2D | 3A | 7B  | 2D | 3B | 4D  | 7B  | 6B  | 7A | 5B | 6D | 5A  | 7D  | 5B  | 6D  | 5D  | 6B  | 7B  | 6B  | 6D  | 7B  | sum |   |   |   |   |   |     |
| CSp   |                |    |    |    |    |     |    |    |    |     |    |    |    |     |    |    |    |     |    |    |     |     |     |    |    |    |     |     |     |     |     |     |     |     |     |     | 1   |   |   |   |   |   |     |
| Pam   |                |    |    |    |    |     |    |    |    |     |    |    |    |     |    |    |    |     |    |    |     |     |     |    |    |    |     |     |     |     |     |     |     |     |     |     |     | 1 |   |   |   |   |     |
| Gar   |                |    |    |    |    |     |    |    |    |     |    |    |    |     |    |    |    |     |    |    |     |     |     |    |    |    |     |     |     |     |     |     |     |     |     |     |     | 1 |   |   |   |   |     |
| Syn   | x <sup>b</sup> |    |    |    | x  |     |    |    |    |     |    |    |    |     |    |    |    |     |    |    |     |     |     |    |    |    |     |     |     |     |     |     |     |     |     |     | 3   |   |   |   |   |   |     |
| W007  |                |    |    |    |    |     |    |    |    |     |    |    |    |     |    |    |    |     |    |    |     |     |     |    |    |    |     |     |     |     |     |     |     |     |     |     | 6   |   |   |   |   |   |     |
| W034  |                |    |    |    |    |     |    |    |    |     |    |    |    |     |    |    |    |     |    |    |     |     |     |    |    |    |     |     |     |     |     |     |     |     |     |     |     | 1 |   |   |   |   |     |
| W044  |                |    |    |    |    |     |    |    |    |     |    |    |    |     |    |    |    |     |    |    |     |     |     |    |    |    |     |     |     |     |     |     |     |     |     |     |     | 8 |   |   |   |   |     |
| W079  |                |    |    |    |    |     |    |    |    |     |    |    |    |     |    |    |    |     |    |    |     |     |     |    |    |    |     |     |     |     |     |     |     |     |     |     |     | 2 |   |   |   |   |     |
| W103  |                |    |    |    |    |     |    |    |    |     |    |    |    |     |    |    |    |     |    |    |     |     |     |    |    |    |     |     |     |     |     |     |     |     |     |     |     | 2 |   |   |   |   |     |
| W110  |                |    |    |    |    |     |    |    |    |     |    |    |    |     |    |    |    |     |    |    |     |     |     |    |    |    |     |     |     |     |     |     |     |     |     |     |     | 3 |   |   |   |   |     |
| W139  |                |    |    |    |    |     |    |    |    |     |    |    |    |     |    |    |    |     |    |    |     |     |     |    |    |    |     |     |     |     |     |     |     |     |     |     |     | 3 |   |   |   |   |     |
| W145  |                |    |    |    |    |     |    |    |    |     |    |    |    |     |    |    |    |     |    |    |     |     |     |    |    |    |     |     |     |     |     |     |     |     |     |     |     | 2 |   |   |   |   |     |
| W199  |                |    |    |    |    |     |    |    |    |     |    |    |    |     |    |    |    |     |    |    |     |     |     |    |    |    |     |     |     |     |     |     |     |     |     |     |     | 1 |   |   |   |   |     |
| W209  |                |    |    |    |    |     |    |    |    |     |    |    |    |     |    |    |    |     |    |    |     |     |     |    |    |    |     |     |     |     |     |     |     |     |     |     |     | 1 |   |   |   |   |     |
| W238  |                |    |    |    |    |     |    |    |    |     |    |    |    |     |    |    |    |     |    |    |     |     |     |    |    |    |     |     |     |     |     |     |     |     |     |     |     | 1 |   |   |   |   |     |
| W254  |                |    |    |    |    |     |    |    |    |     |    |    |    |     |    |    |    |     |    |    |     |     |     |    |    |    |     |     |     |     |     |     |     |     |     |     |     | 1 |   |   |   |   |     |
| W273  |                |    |    |    |    |     |    |    |    |     |    |    |    |     |    |    |    |     |    |    |     |     |     |    |    |    |     |     |     |     |     |     |     |     |     |     |     | 1 |   |   |   |   |     |
| W299  |                |    |    |    |    |     |    |    |    |     |    |    |    |     |    |    |    |     |    |    |     |     |     |    |    |    |     |     |     |     |     |     |     |     |     |     |     | 3 |   |   |   |   |     |
| W300  |                |    |    |    |    |     |    |    |    |     |    |    |    |     |    |    |    |     |    |    |     |     |     |    |    |    |     |     |     |     |     |     |     |     |     |     |     | 3 |   |   |   |   |     |
| W308  |                |    |    |    |    |     |    |    |    |     |    |    |    |     |    |    |    |     |    |    |     |     |     |    |    |    |     |     |     |     |     |     |     |     |     |     |     | 4 |   |   |   |   |     |
| W324  |                |    |    |    |    |     |    |    |    |     |    |    |    |     |    |    |    |     |    |    |     |     |     |    |    |    |     |     |     |     |     |     |     |     |     |     |     | 1 |   |   |   |   |     |
| W352  |                |    |    |    |    |     |    |    |    |     |    |    |    |     |    |    |    |     |    |    |     |     |     |    |    |    |     |     |     |     |     |     |     |     |     |     |     | 4 |   |   |   |   |     |
| W387  |                |    |    |    |    |     |    |    |    |     |    |    |    |     |    |    |    |     |    |    |     |     |     |    |    |    |     |     |     |     |     |     |     |     |     |     |     | 4 |   |   |   |   |     |
| W468  |                |    |    |    |    |     |    |    |    |     |    |    |    |     |    |    |    |     |    |    |     |     |     |    |    |    |     |     |     |     |     |     |     |     |     |     |     | 1 |   |   |   |   |     |
| W471  |                |    |    |    |    |     |    |    |    |     |    |    |    |     |    |    |    |     |    |    |     |     |     |    |    |    |     |     |     |     |     |     |     |     |     |     |     | 4 |   |   |   |   |     |
| W475  |                |    |    |    |    |     |    |    |    |     |    |    |    |     |    |    |    |     |    |    |     |     |     |    |    |    |     |     |     |     |     |     |     |     |     |     |     | 3 |   |   |   |   |     |
| W546  |                |    |    |    |    |     |    |    |    |     |    |    |    |     |    |    |    |     |    |    |     |     |     |    |    |    |     |     |     |     |     |     |     |     |     |     |     | 3 |   |   |   |   |     |
| W566  |                |    |    |    |    |     |    |    |    |     |    |    |    |     |    |    |    |     |    |    |     |     |     |    |    |    |     |     |     |     |     |     |     |     |     |     |     | 2 |   |   |   |   |     |
| W591  |                |    |    |    |    |     |    |    |    |     |    |    |    |     |    |    |    |     |    |    |     |     |     |    |    |    |     |     |     |     |     |     |     |     |     |     |     | 2 |   |   |   |   |     |
| W624  |                |    |    |    |    |     |    |    |    |     |    |    |    |     |    |    |    |     |    |    |     |     |     |    |    |    |     |     |     |     |     |     |     |     |     |     |     | 3 |   |   |   |   |     |
| W627  |                |    |    |    |    |     |    |    |    |     |    |    |    |     |    |    |    |     |    |    |     |     |     |    |    |    |     |     |     |     |     |     |     |     |     |     |     | 2 |   |   |   |   |     |
| W629  |                |    |    |    |    |     |    |    |    |     |    |    |    |     |    |    |    |     |    |    |     |     |     |    |    |    |     |     |     |     |     |     |     |     |     |     |     | 4 |   |   |   |   |     |
| W670  |                |    |    |    |    |     |    |    |    |     |    |    |    |     |    |    |    |     |    |    |     |     |     |    |    |    |     |     |     |     |     |     |     |     |     |     |     | 1 |   |   |   |   |     |
| W680  |                |    |    |    |    |     |    |    |    |     |    |    |    |     |    |    |    |     |    |    |     |     |     |    |    |    |     |     |     |     |     |     |     |     |     |     |     | 1 |   |   |   |   |     |
| W694  |                |    |    |    |    |     |    |    |    |     |    |    |    |     |    |    |    |     |    |    |     |     |     |    |    |    |     |     |     |     |     |     |     |     |     |     |     | 2 |   |   |   |   |     |
| W707  |                |    |    |    |    |     |    |    |    |     |    |    |    |     |    |    |    |     |    |    |     |     |     |    |    |    |     |     |     |     |     |     |     |     |     |     |     | 4 |   |   |   |   |     |
| W729  |                |    |    |    |    |     |    |    |    |     |    |    |    |     |    |    |    |     |    |    |     |     |     |    |    |    |     |     |     |     |     |     |     |     |     |     |     | 1 |   |   |   |   |     |
| W731  |                |    |    |    |    |     |    |    |    |     |    |    |    |     |    |    |    |     |    |    |     |     |     |    |    |    |     |     |     |     |     |     |     |     |     |     |     | 4 |   |   |   |   |     |
| W777  |                |    |    |    |    |     |    |    |    |     |    |    |    |     |    |    |    |     |    |    |     |     |     |    |    |    |     |     |     |     |     |     |     |     |     |     |     | 1 |   |   |   |   |     |
| W784  |                |    |    |    |    |     |    |    |    |     |    |    |    |     |    |    |    |     |    |    |     |     |     |    |    |    |     |     |     |     |     |     |     |     |     |     |     | 5 |   |   |   |   |     |
| W811  |                |    |    |    |    |     |    |    |    |     |    |    |    |     |    |    |    |     |    |    |     |     |     |    |    |    |     |     |     |     |     |     |     |     |     |     |     | 1 |   |   |   |   |     |
| W827  |                |    |    |    |    |     |    |    |    |     |    |    |    |     |    |    |    |     |    |    |     |     |     |    |    |    |     |     |     |     |     |     |     |     |     |     |     | 3 |   |   |   |   |     |
| occur | 1              | 1  | 1  | 1  | 1  | 6   | 1  | 1  | 2  | 1   | 1  | 1  | 4  | 1   | 7  | 1  | 1  | 1   | 4  | 1  | 1   | 1   | 1   | 1  | 1  | 5  | 2   | 1   | 1   | 1   | 1   | 1   | 1   | 3   | 1   | 3   | 18  | 1 | 1 | 5 | 1 | 2 | 105 |

**Table S 7 Translocation types found in the NAM panel** Of 58 bi-parental genetic maps 42 showed signatures translocations. Par is reference parent for all populations. A detected translocation is noted as 'x' in the table underneath the translocation type. For two translocations predicted from the maps the reciprocal translocation were found (indicated by <sup>a</sup>). Two translocations were predicted by genetic mapping and the estRF plots (indicated by <sup>b</sup>). and 15 translocations were predicted from the estRF plot alone (indicated by <sup>c</sup>). The number of translocations per line are summed up on the right and per type at the bottom. Abbreviations: TL = translocation, acc = accession, occur = occurrence.

| Population | Chr | Pos   | LOD  | %Var | Add.Eff | Nearest Marker |
|------------|-----|-------|------|------|---------|----------------|
| ParW044    | 1A  | 42.7  | 3.0  | 2.9  | -2.2    | BS00076668     |
| ParW139    | 1A  | 3.7   | 3.0  | 11.9 | -1.2    | BS00023182     |
| ParW300    | 1A  | 19.2  | 2.6  | 11.2 | -1.6    | BS00062783     |
| ParW440    | 1A  | 57.0  | 3.3  | 13.6 | 1.2     | BS00084986     |
| ParW475    | 1A  | 15.0  | 2.7  | 8.8  | -0.3    | BS00035720     |
| ParW729    | 1A  | 103.8 | 2.9  | 9.9  | -1.7    | BS00010039     |
| PamPar     | 1B  | 1.0   | 3.1  | 12.2 | 1.2     | BS00022874     |
| ParW044    | 1B  | 0.0   | 13.8 | 18.0 | -3.0    | BS00022609     |
| ParW103    | 1B  | 18.0  | 2.0  | 6.1  | 1.0     | BS00022778     |
| ParW238    | 1B  | 54.0  | 2.4  | 11.5 | -1.8    | BS00078414     |
| ParW324    | 1B  | 29.0  | 2.2  | 9.3  | -0.1    | BS00022775     |
| ParW396    | 1B  | 1.0   | 4.2  | 14.4 |         | BS00080214     |
| ParW468    | 1B  | 1.0   | 4.1  | 14.3 | -1.1    | BS00011360     |
| ParW475    | 1B  | 10.0  | 2.8  | 9.3  | -0.8    | BS00082143     |
| ParW777    | 1B  | 83.0  | 2.2  | 9.3  | 1.5     | BS00078414     |
| ParW433    | 1D  | 2.0   | 4.0  | 12.6 | 0.7     | BS00055737     |
| ParW624    | 1D  | 30.0  | 2.6  | 10.3 | -1.7    | BS00079462     |
| ParSyn     | 2A  | 44.0  | 2.0  | 3.1  | 0.2     | BS00008805     |
| ParW034    | 2A  | 40.0  | 4.8  | 16.8 | 1.4     | BS00001108     |
| ParW044    | 2A  | 45.0  | 4.1  | 4.1  | -1.5    | BS00001108     |
| ParW141    | 2A  | 24.6  | 4.0  | 14.9 | 0.5     | BS00024921     |
| ParW300    | 2A  | 0.0   | 2.4  | 10.0 | -0.6    | BS00008805     |
| ParW440    | 2A  | 21.3  | 2.9  | 11.8 | -0.5    | BS00078489     |
| ParW627    | 2A  | 20.0  | 2.9  | 7.7  | 0.7     | BS00059111     |
| ParW827    | 2A  | 55.0  | 2.2  | 10.4 | -1.3    | BS00023083     |
| ParGar     | 2B  | 65.0  | 2.9  | 3.4  | 0.3     | BS00059315     |
| ParW034    | 2B  | 4.0   | 4.3  | 15.0 | -0.6    | BS00011388     |
| ParW308    | 2B  | 0.0   | 2.3  | 9.2  | -1.3    | BS00023068     |
| ParW044    | 2D  | 29.0  | 5.3  | 5.5  | -2.1    | BS00043985     |
| ParW433    | 2D  | 54.0  | 4.7  | 15.3 | 0.9     | BS00021950     |
| ParW652    | 2D  | 88.1  | 2.4  | 11.0 | 0.7     | BS00021950     |
| ParW034    | 3A  | 24.7  | 2.0  | 6.7  | 1.1     | BS00010414     |
| ParW044    | 3A  | 2.0   | 11.7 | 14.5 | -2.2    | BS00022844     |
| ParW103    | 3A  | 46.0  | 2.2  | 6.6  | 1.1     | BS00022862     |
| ParW209    | 3A  | 101.0 | 4.5  | 12.8 | 0.8     | BS00022862     |
| ParW254    | 3A  | 113.7 | 2.8  | 12.7 | 1.2     | BS00022410     |
| ParW396    | 3A  | 67.1  | 2.3  | 7.5  | -0.8    | BS00076631     |
| ParW546    | 3A  | 0.0   | 2.1  | 9.7  | -1.2    | BS00022844     |
| ParW562    | 3A  | 99.0  | 3.1  | 13.4 | 0.5     | BS00022092     |
| ParW566    | 3A  | 94.0  | 2.3  | 10.2 | -0.9    | BS00022735     |
| ParW680    | 3A  | 35.3  | 2.6  | 9.6  | 1.1     | BS00022844     |
| ParW729    | 3A  | 13.3  | 2.7  | 9.0  | -2.4    | BS00009805     |
| ParW044    | 3B  | 38.2  | 5.4  | 5.7  | -2.2    | BS00089954     |
| ParW103    | 3B  | 0.0   | 3.3  | 10.2 | 0.2     | BS00023186     |
| ParW110    | 3B  | 134.0 | 5.0  | 16.8 | 4.6     | BS00089954     |
| ParW209    | 3B  | 31.3  | 3.0  | 8.4  | 1.9     | BS00011373     |
| ParW406    | 3B  | 48.0  | 2.2  | 9.2  | 0.6     | BS00060073     |
| ParW471    | 3B  | 28.0  | 3.3  | 12.5 | 0.7     | BS00030651     |
| ParW680    | 3B  | 42.0  | 2.8  | 10.7 | 0.7     | BS00060073     |
| ParW722    | 3B  | 16.0  | 4.0  | 13.1 | 0.2     | BS00022315     |
| ParW141    | 3D  | 40.0  | 3.1  | 11.1 | -1.0    | BS00037276     |
| ParW219    | 3D  | 6.0   | 2.3  | 7.5  | -0.8    | BS00082501     |
| ParGar     | 4A  | 18.0  | 2.6  | 3.1  | 0.1     | BS00035322     |
| ParW044    | 4A  | 0.0   | 2.2  | 2.2  | -2.5    | BS00065607     |
| ParW079    | 4A  | 46.0  | 2.5  | 8.5  | -0.8    | BS00088726     |
| ParW219    | 4A  | 100.0 | 2.1  | 6.8  | -0.8    | BS00048067     |
| ParW299    | 4A  | 0.0   | 3.2  | 11.1 | -0.8    | BS00065863     |
| ParW387    | 4A  | 26.0  | 3.4  | 13.8 | 0.7     | BS00049911     |
| ParW433    | 4A  | 5.0   | 2.0  | 6.1  | 0.2     | BS00036472     |
| ParW468    | 4A  | 69.1  | 2.4  | 8.0  | -1.0    | BS00018651     |
| ParW627    | 4A  | 69.0  | 4.3  | 11.9 | -0.1    | BS00043286     |
| ParW707    | 4A  | 46.0  | 2.1  | 8.9  | -1.4    | BS00060097     |
| ParW722    | 4A  | 8.0   | 3.7  | 12.0 | -1.9    | BS00021989     |

| Population | Chr | Pos   | LOD | %Var | Add.Eff | Nearest Marker |
|------------|-----|-------|-----|------|---------|----------------|
| ParW784    | 4A  | 0.0   | 2.0 | 9.3  | -1.1    | BS00065863     |
| ParW044    | 4B  | 20.4  | 9.6 | 11.3 | -1.9    | BS00094771     |
| ParW110    | 4B  | 42.3  | 2.6 | 8.2  | 0.8     | BS00022793     |
| ParW199    | 4B  | 8.4   | 3.1 | 13.4 | -1.6    | BS00067242     |
| ParW209    | 4B  | 27.0  | 2.9 | 8.0  | 0.7     | BS00010015     |
| ParW566    | 4B  | 7.0   | 2.1 | 9.2  | 0.8     | BS00044374     |
| ParW627    | 4B  | 35.0  | 2.3 | 6.1  | 0.6     | BS00042105     |
| ParW629    | 4D  | 7.5   | 2.3 | 8.9  | -1.2    | BS00068013     |
| GlaPar     | 5A  | 13.0  | 2.8 | 7.1  | 0.2     | BS00022191     |
| ParGar     | 5A  | 39.0  | 3.0 | 3.6  | -0.5    | BS00029413     |
| ParW007    | 5A  | 4.3   | 2.4 | 10.9 | 0.3     | BS00110139     |
| ParW044    | 5A  | 69.0  | 8.5 | 9.6  | -1.9    | IS00027559     |
| ParW079    | 5A  | 61.0  | 2.2 | 7.7  | 0.8     | BS00022644     |
| ParW139    | 5A  | 19.1  | 2.7 | 10.7 | -1.2    | BS00066143     |
| ParW209    | 5A  | 11.6  | 4.7 | 13.5 | 2.0     | BS00028802     |
| ParW468    | 5A  | 242.6 | 2.1 | 6.9  | 0.2     | BS00047751     |
| ParW475    | 5A  | 70.0  | 4.6 | 16.1 | -1.3    | BS00022891     |
| ParW591    | 5A  | 18.0  | 3.1 | 13.2 | 0.7     | BS00021953     |
| ParW627    | 5A  | 49.0  | 4.0 | 11.2 | -1.4    | BS00075595     |
| ParW044    | 5B  | 0.0   | 6.0 | 6.4  | -2.4    | BS00023072     |
| ParW308    | 5B  | 44.5  | 3.9 | 16.5 | -0.4    | BS00065729     |
| ParW360    | 5B  | 20.0  | 2.1 | 9.9  | -1.1    | BS00040784     |
| ParW471    | 5B  | 28.6  | 3.0 | 11.0 | 0.5     | BS00084528     |
| ParW627    | 5B  | 37.8  | 3.0 | 8.2  | -0.9    | BS00084528     |
| ParW731    | 5B  | 75.4  | 2.6 | 12.0 | -1.0    | BS00022405     |
| PamPar     | 6A  | 2.0   | 2.6 | 10.3 | -1.0    | BS00023192     |
| ParSyn     | 6A  | 16.5  | 2.6 | 4.0  | 0.7     | BS00022951     |
| ParW079    | 6A  | 8.0   | 4.7 | 17.2 | -0.4    | BS00022628     |
| ParW299    | 6A  | 3.0   | 2.4 | 8.2  | -1.2    | BS00081386     |
| ParW308    | 6A  | 4.0   | 2.9 | 12.2 | 0.4     | BS00105466     |
| ParW722    | 6A  | 13.0  | 3.4 | 10.8 | -1.3    | BS00023192     |
| ParW811    | 6A  | 0.0   | 2.0 | 7.6  | 1.0     | BS00083630     |
| ParW034    | 6B  | 60.0  | 3.0 | 10.0 | -0.0    | BS00004016     |
| ParW044    | 6B  | 0.0   | 7.0 | 7.7  | -2.1    | BS00067590     |
| ParW110    | 6B  | 122.0 | 2.0 | 6.4  | -0.8    | BS00077844     |
| ParW145    | 6B  | 0.0   | 3.0 | 13.5 | -0.2    | BS00085589     |
| ParW219    | 6B  | 3.3   | 3.5 | 11.5 | 1.2     | BS00081608     |
| ParW352    | 6B  | 19.5  | 2.0 | 7.0  |         | BS00011365     |
| ParW433    | 6B  | 13.0  | 3.4 | 10.5 | 0.1     | BS00049941     |
| ParW044    | 6D  | 16.6  | 7.0 | 7.7  | -2.5    | BS00059791     |
| ParW273    | 6D  | 0.0   | 3.5 | 14.1 | -1.8    | BS00042153     |
| ParW483    | 6D  | 3.0   | 3.0 | 13.7 | 1.0     | IS00007973     |
| ParSyn     | 7A  | 70.7  | 4.2 | 6.7  | 1.0     | BS00022049     |
| ParW044    | 7A  | 52.0  | 2.6 | 2.6  | -2.6    | BS00023109     |
| ParW352    | 7A  | 43.0  | 2.7 | 9.9  | -1.3    | BS0004786      |
| ParW387    | 7A  | 82.0  | 2.5 | 9.9  | -1.1    | BS00071736     |
| ParW396    | 7A  | 69.0  | 4.9 | 16.9 | -0.5    | BS00063460     |
| ParW468    | 7A  | 7.0   | 3.3 | 11.3 |         | BS00110283     |
| ParW627    | 7A  | 53.0  | 3.2 | 8.7  | 0.6     | BS00021964     |
| ParW722    | 7A  | 13.0  | 3.1 | 9.9  | 1.2     | BS00025521     |
| ParW811    | 7A  | 76.0  | 3.1 | 12.1 | 0.1     | BS00023128     |
| ParW209    | 7B  | 43.0  | 4.1 | 11.8 | -2.0    | BS00010355     |
| ParW475    | 7B  | 8.0   | 2.3 | 7.5  | 0.2     | BS00064146     |
| ParW624    | 7B  | 6.0   | 2.7 | 10.7 | -0.9    | BS00049372     |
| ParW707    | 7D  | 49.0  | 2.0 | 8.5  | 0.6     | BS00022312     |
| ParW811    | 7D  | 76.9  | 2.7 | 10.3 | -0.9    | BS00098027     |

**Table S 8 Summary table of QTL detected for the trait crossover count** Abbreviation of population names as in Table 1. Abbreviations: Chr='Chromosome', Pos='Position', %Var='Variation explained', Add.Eff='Additive Effect'.

| chr | marker name | occur | populations                                                            |
|-----|-------------|-------|------------------------------------------------------------------------|
| 1B  | BS00022101  | 4     | PamPar, ParW396, ParW475, ParW777                                      |
| 1B  | BS00022539  | 4     | ParW103, ParW238, ParW475, ParW777                                     |
| 1B  | BS00074911  | 3     | ParW044, ParW324, ParW475                                              |
| 1B  | BS00099829  | 3     | ParW396, ParW475, ParW777                                              |
| 2A  | BS00008805  | 5     | ParSyn, ParW034, ParW300, ParW627, ParW827                             |
| 2A  | BS00059111  | 5     | ParW044, ParW300, ParW440, ParW627, ParW827                            |
| 2A  | BS00078489  | 5     | ParW034, ParW300, ParW440, ParW627, ParW827                            |
| 2A  | BS00001108  | 4     | ParW034, ParW044, ParW440, ParW827                                     |
| 2A  | BS00027847  | 4     | ParW141, ParW440, ParW627, ParW827                                     |
| 2A  | BS00107316  | 4     | ParW044, ParW440, ParW627, ParW827                                     |
| 2A  | BS00019094  | 3     | ParW044, ParW300, ParW440                                              |
| 2A  | BS00022995  | 3     | ParW300, ParW440, ParW827                                              |
| 2A  | BS00023214  | 3     | ParSyn, ParW440, ParW627                                               |
| 2A  | BS00056232  | 3     | ParW044, ParW440, ParW627                                              |
| 3A  | BS00022862  | 7     | ParW034, ParW103, ParW209, ParW254, ParW396, ParW546, ParW566          |
| 3A  | BS00074617  | 7     | ParW034, ParW044, ParW103, ParW254, ParW396, ParW546, ParW566          |
| 3A  | BS00022410  | 5     | ParW209, ParW254, ParW546, ParW562, ParW566                            |
| 3A  | BS00024548  | 5     | ParW034, ParW103, ParW209, ParW546, ParW566                            |
| 3A  | BS00070014  | 5     | ParW103, ParW254, ParW396, ParW546, ParW566                            |
| 3A  | BS00022844  | 4     | ParW044, ParW254, ParW546, ParW680                                     |
| 3A  | BS00023087  | 4     | ParW254, ParW396, ParW546, ParW566                                     |
| 3A  | BS00025739  | 4     | ParW254, ParW396, ParW680, ParW729                                     |
| 3A  | BS00041121  | 4     | ParW103, ParW396, ParW546, ParW680                                     |
| 3A  | BS00022735  | 3     | ParW254, ParW562, ParW566                                              |
| 3B  | BS00023030  | 5     | ParW044, ParW209, ParW406, ParW471, ParW680                            |
| 3B  | BS00022403  | 4     | ParW209, ParW406, ParW471, ParW680                                     |
| 3B  | BS00022961  | 4     | ParW103, ParW209, ParW406, ParW680                                     |
| 3B  | BS00022315  | 3     | ParW209, ParW406, ParW722                                              |
| 3B  | BS00022803  | 3     | ParW110, ParW209, ParW722                                              |
| 3B  | BS00060073  | 3     | ParW209, ParW406, ParW680                                              |
| 3B  | BS00069132  | 3     | ParW406, ParW471, ParW680                                              |
| 3B  | BS00089954  | 3     | ParW044, ParW110, ParW471                                              |
| 4A  | BS00049911  | 8     | ParW044, ParW079, ParW219, ParW387, ParW433, ParW627, ParW707, ParW784 |
| 4A  | BS00065607  | 7     | ParW044, ParW079, ParW219, ParW299, ParW387, ParW627, ParW784          |
| 4A  | BS00060097  | 6     | ParW219, ParW387, ParW433, ParW627, ParW707, ParW784                   |
| 4A  | BS00021989  | 5     | ParW219, ParW299, ParW627, ParW707, ParW722                            |
| 4A  | BS00088726  | 4     | ParW079, ParW219, ParW299, ParW707                                     |
| 4A  | BS00101512  | 4     | ParW219, ParW299, ParW707, ParW722                                     |
| 4A  | BS00048067  | 3     | ParW219, ParW299, ParW722                                              |
| 4A  | BS00065863  | 3     | ParW219, ParW299, ParW784                                              |
| 4B  | BS00040517  | 4     | ParW044, ParW110, ParW209, ParW566                                     |
| 5A  | BS00021953  | 6     | GlaPar, ParGar, ParW007, ParW139, ParW468, ParW591                     |
| 5A  | BS00021955  | 5     | GlaPar, ParGar, ParW079, ParW139, ParW591                              |
| 5A  | BS00110139  | 4     | ParW007, ParW044, ParW468, ParW591                                     |
| 5A  | BS00022891  | 3     | ParW468, ParW475, ParW627                                              |
| 5A  | BS00029413  | 3     | GlaPar, ParGar, ParW468                                                |
| 5A  | BS00043676  | 3     | ParW209, ParW468, ParW475                                              |
| 5A  | BS00079069  | 3     | GlaPar, ParGar, ParW139                                                |
| 5B  | BS00047751  | 4     | ParW360, ParW471, ParW627, ParW731                                     |
| 5B  | BS00106043  | 4     | ParW044, ParW308, ParW360, ParW731                                     |
| 5B  | BS00022780  | 3     | ParW360, ParW471, ParW731                                              |
| 5B  | BS00022999  | 3     | ParW360, ParW471, ParW731                                              |
| 6A  | BS00081386  | 5     | PamPar, ParW299, ParW308, ParW722, ParW811                             |
| 6A  | BS00105466  | 5     | ParW079, ParW299, ParW308, ParW722, ParW811                            |
| 6A  | BS00023119  | 4     | ParW079, ParW308, ParW722, ParW811                                     |
| 6A  | BS00022628  | 3     | ParW079, ParW722, ParW811                                              |
| 6A  | BS00023192  | 3     | PamPar, ParSyn, ParW722                                                |
| 6A  | BS00054054  | 3     | ParW079, ParW308, ParW722                                              |
| 6A  | BS00061296  | 3     | ParW079, ParW308, ParW722                                              |
| 6B  | BS00010420  | 3     | ParW468, ParW034, ParW352                                              |
| 6B  | BS00067590  | 3     | ParW044, ParW219, ParW433                                              |
| 6B  | BS00081608  | 3     | ParW034, ParW219, ParW352                                              |
| 7A  | BS00031028  | 5     | ParW044, ParW396, ParW468, ParW627, ParW811                            |
| 7A  | BS00025521  | 4     | ParW352, ParW468, ParW627, ParW722                                     |
| 7A  | BS00033613  | 3     | ParW044, ParW387, ParW627                                              |

**Table S 9** Markers present in at least three confidence intervals of the crossover count QTL. Abbreviation of population names as in Table 1 (Wingen et al. 2016). Abbreviations: chr = Chromosome.

Figure S 1

Figure S 1: **Diagrams of the marker density and distribution of 60 bi-parental genetic linkage maps.** The name of the bi-parental population is given on the top left corner of each diagram. Vertical bars below depict LGs of the map, with the name of the LG given on top. Horizontal ticks on the bars refer to marker positions. The spacing of the ticks reflect the genetic distances of the markers. A centimorgan scale is given on the left hand side of each map. Abbreviation of population names as in Table 1.

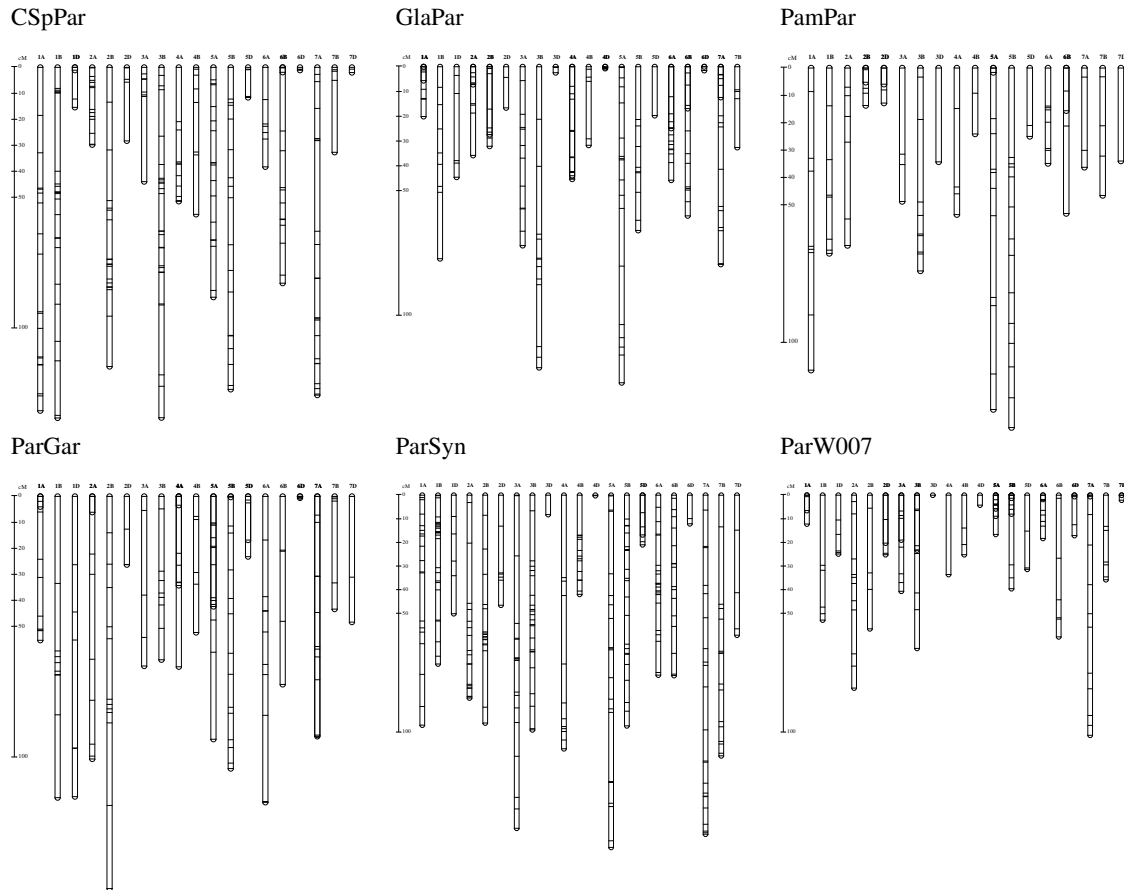

ParW034

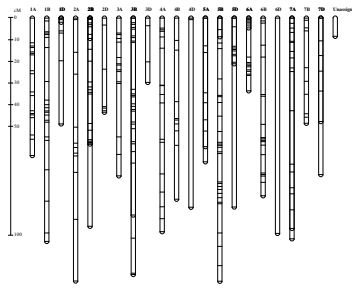

ParW044

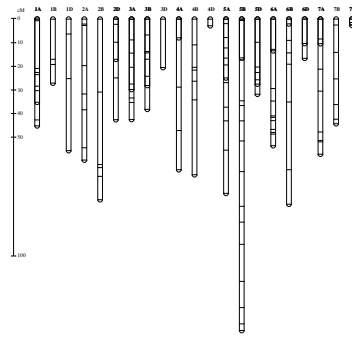

ParW079

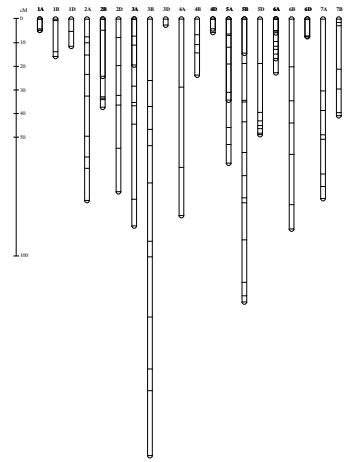

ParW103

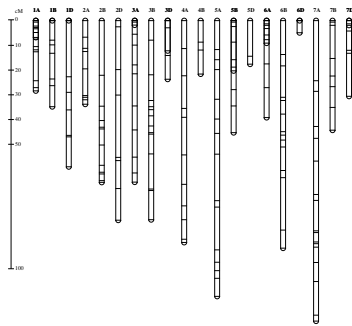

ParW110

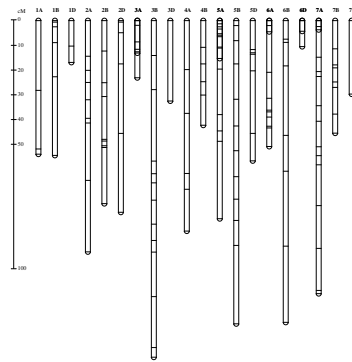

ParW139

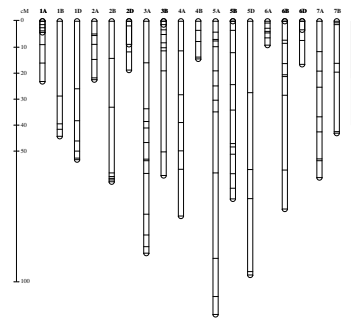

ParW141

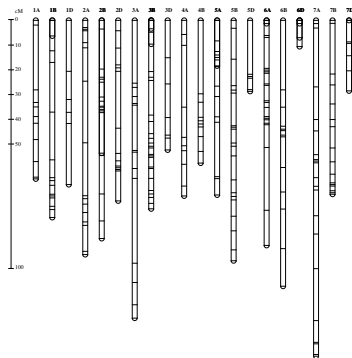

ParW145

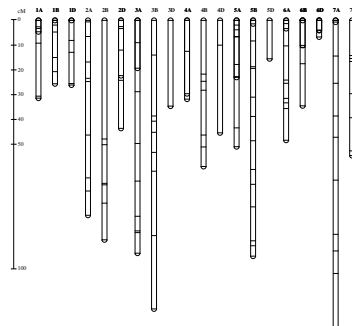

ParW199

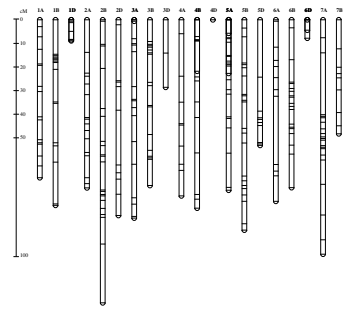

ParW209

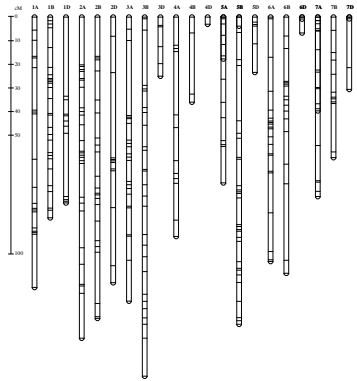

ParW219

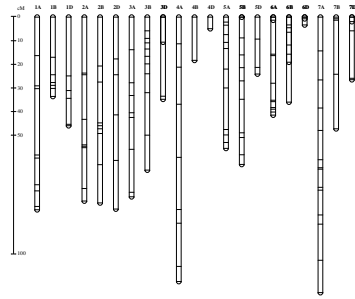

ParW224

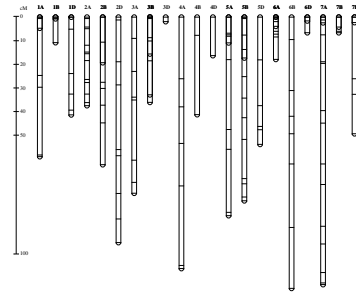

ParW238

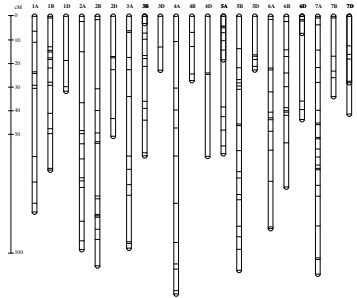

ParW254

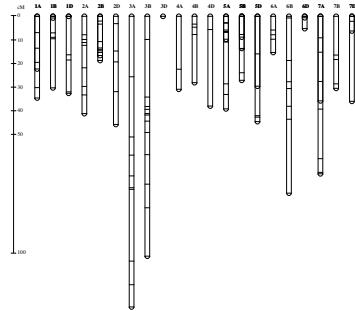

ParW273

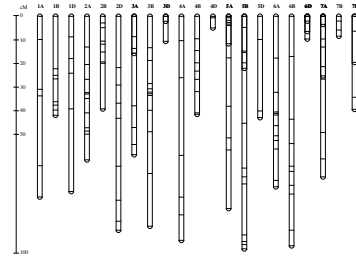

ParW281

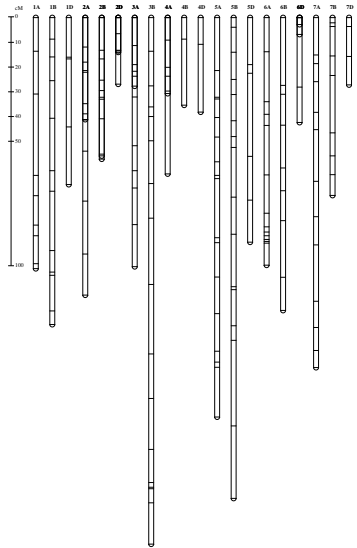

ParW292

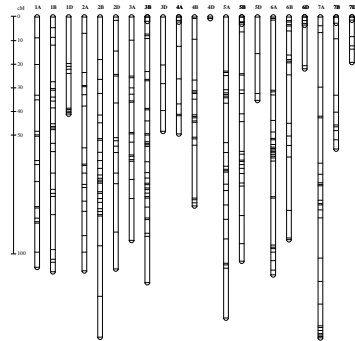

ParW299

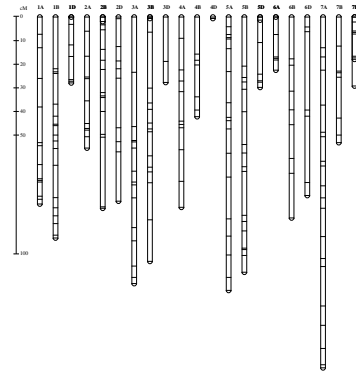

ParW300

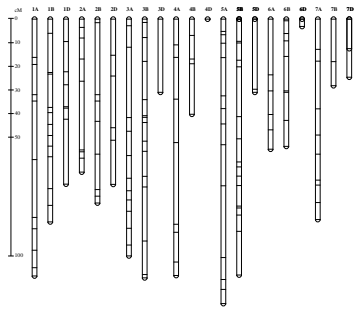

ParW308

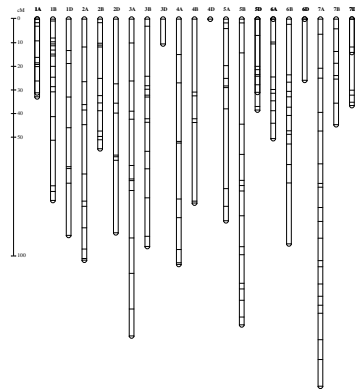

ParW313

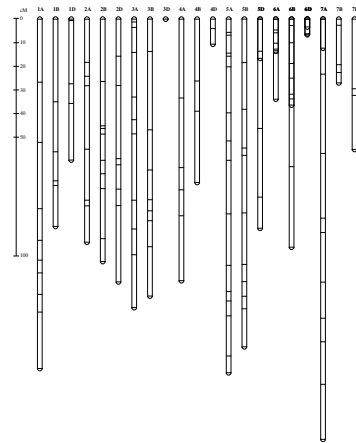

ParW324

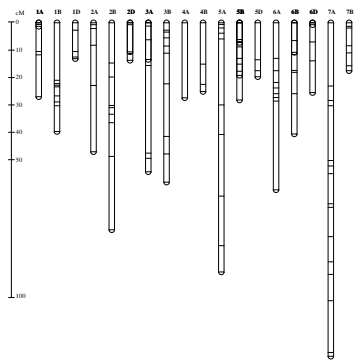

ParW352

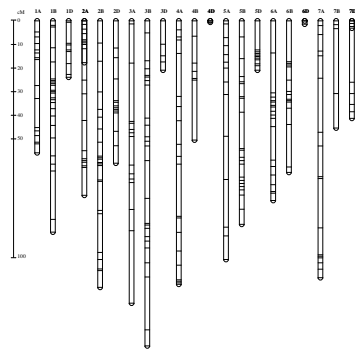

ParW360

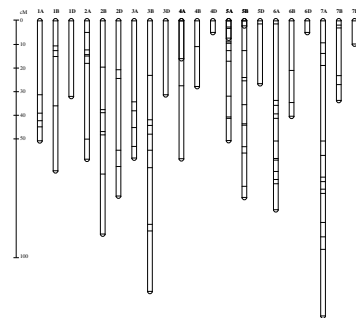

ParW387

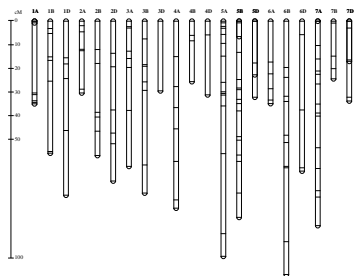

ParW396

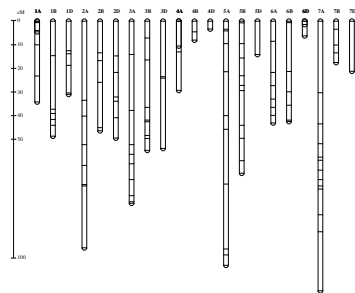

ParW406

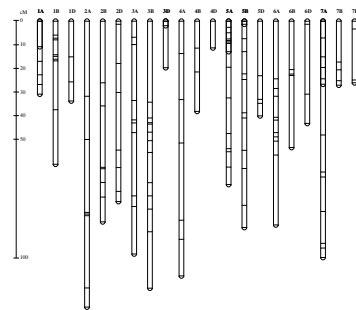



ParW433

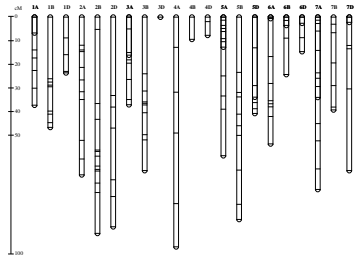

ParW440

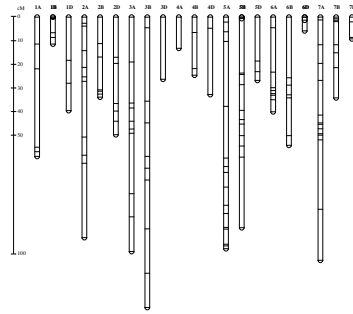

ParW468

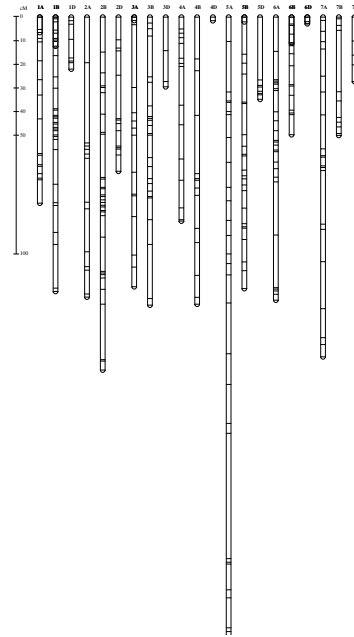

ParW471

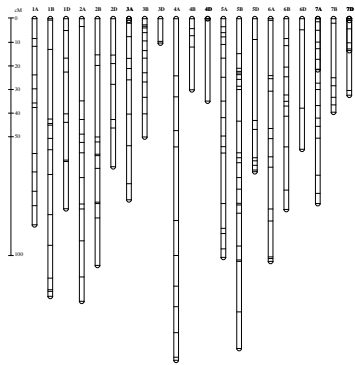

ParW475

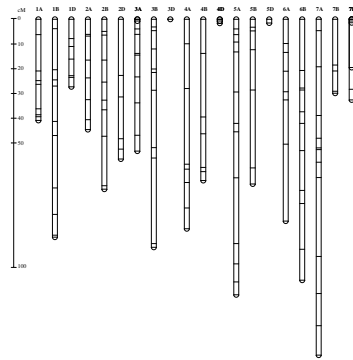

ParW483

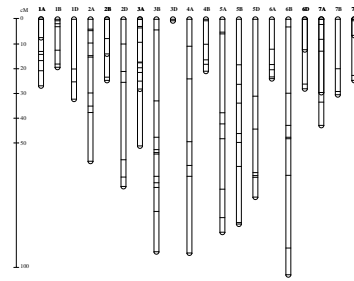

ParW546

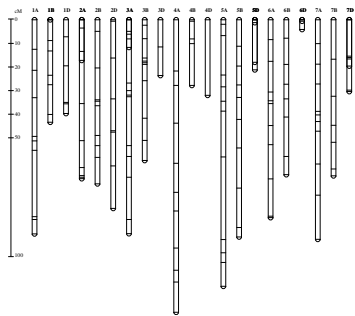

ParW562

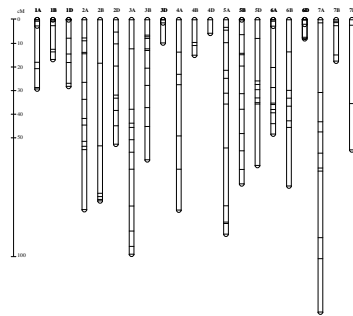

ParW566

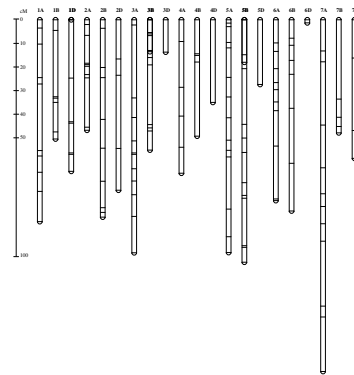

ParW591

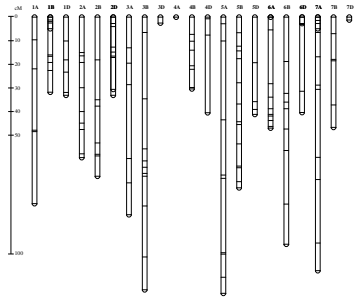

ParW624

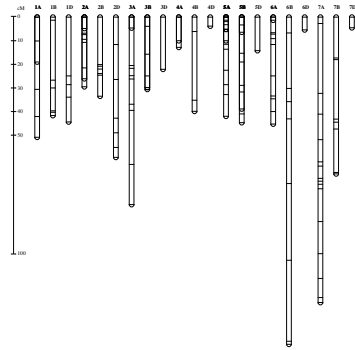

ParW627

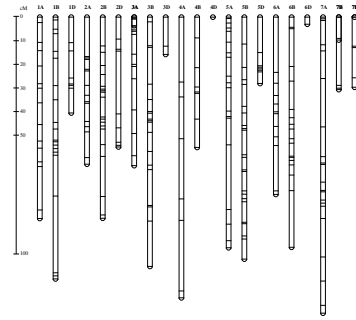

ParW629

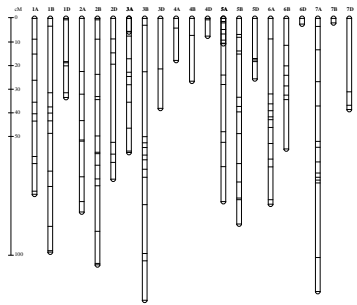

ParW651

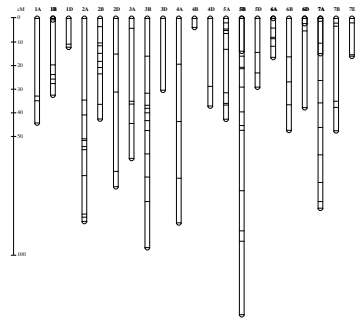

ParW652

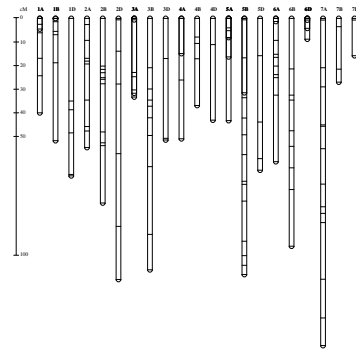

ParW670

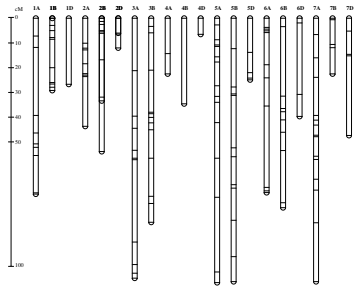

ParW680

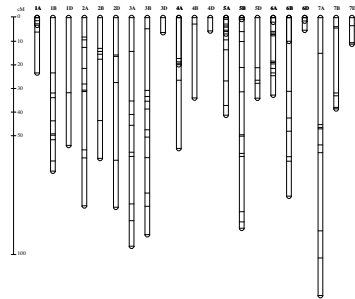

ParW694

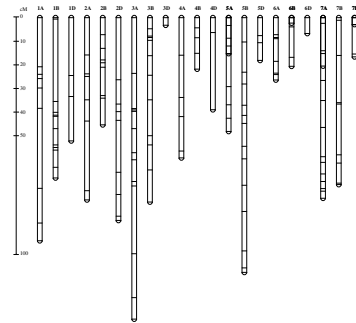

ParW707

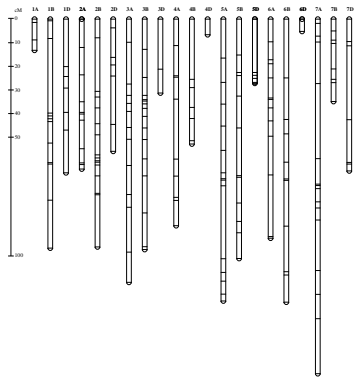

ParW722

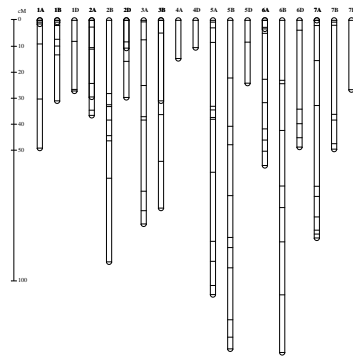

ParW729

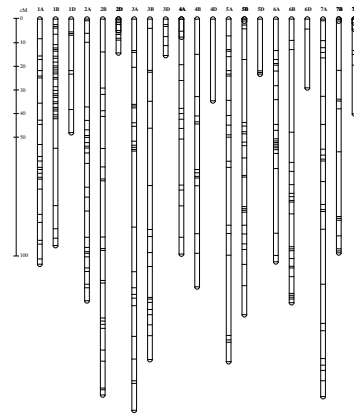

ParW731

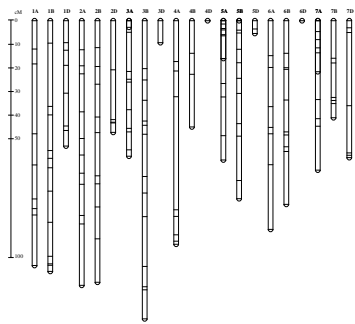

ParW740

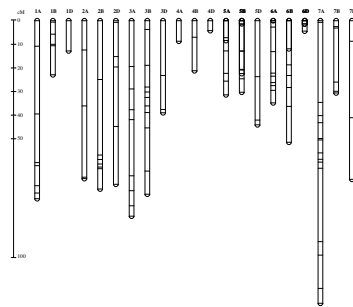

ParW777

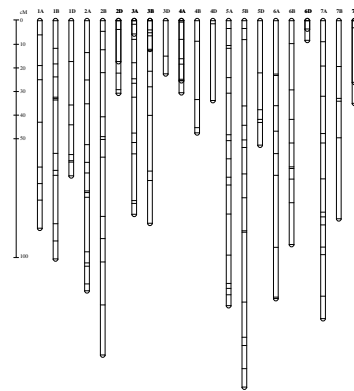

ParW784

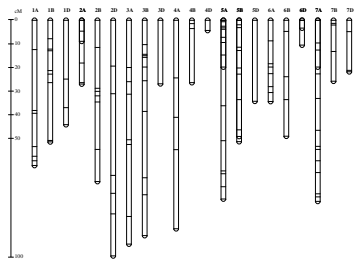

ParW811

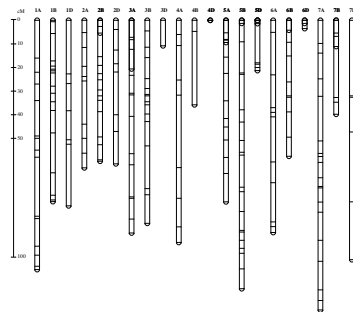

ParW827

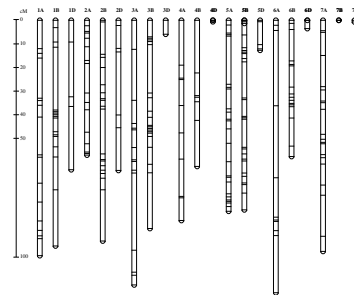

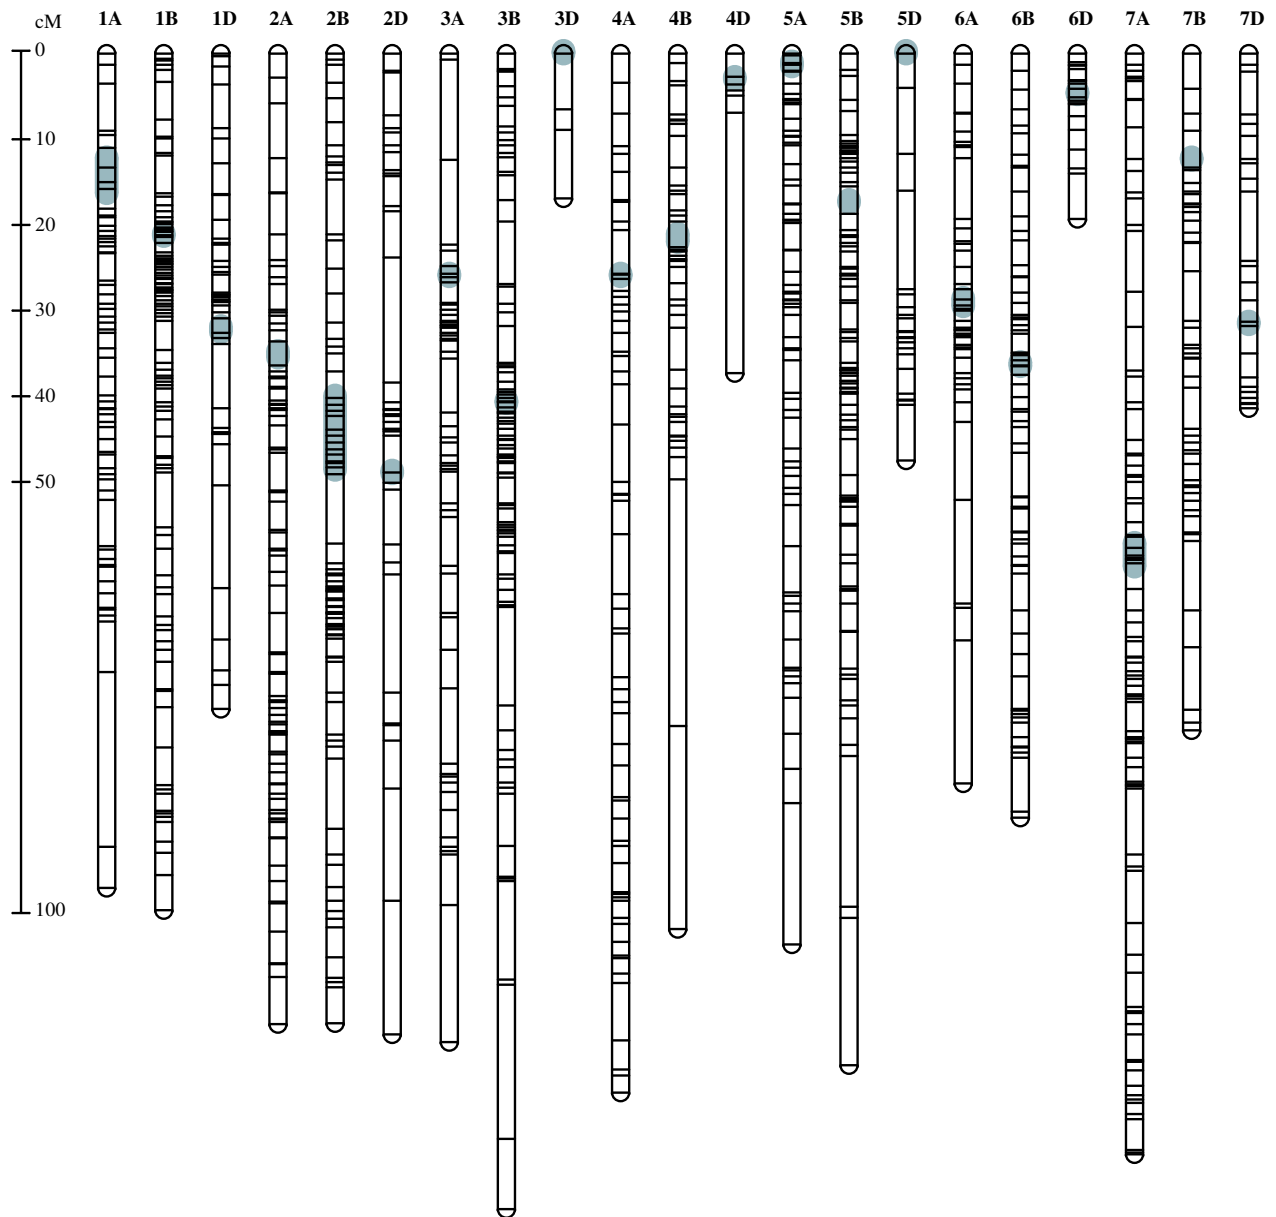

**Figure S 2 LRC map marker density.** Diagram of the distribution and density of markers on the LRC map constructed from 60 bi-parental population maps. Vertical bars depict LGs of the map, with the name of the LG given on top. Horizontal ticks on the bars refer to marker positions. The spacing of the ticks reflect the genetic distances of the markers. Centromere regions are indicated by a light blue shading. A centimorgan scale is given on the left hand side of each map.

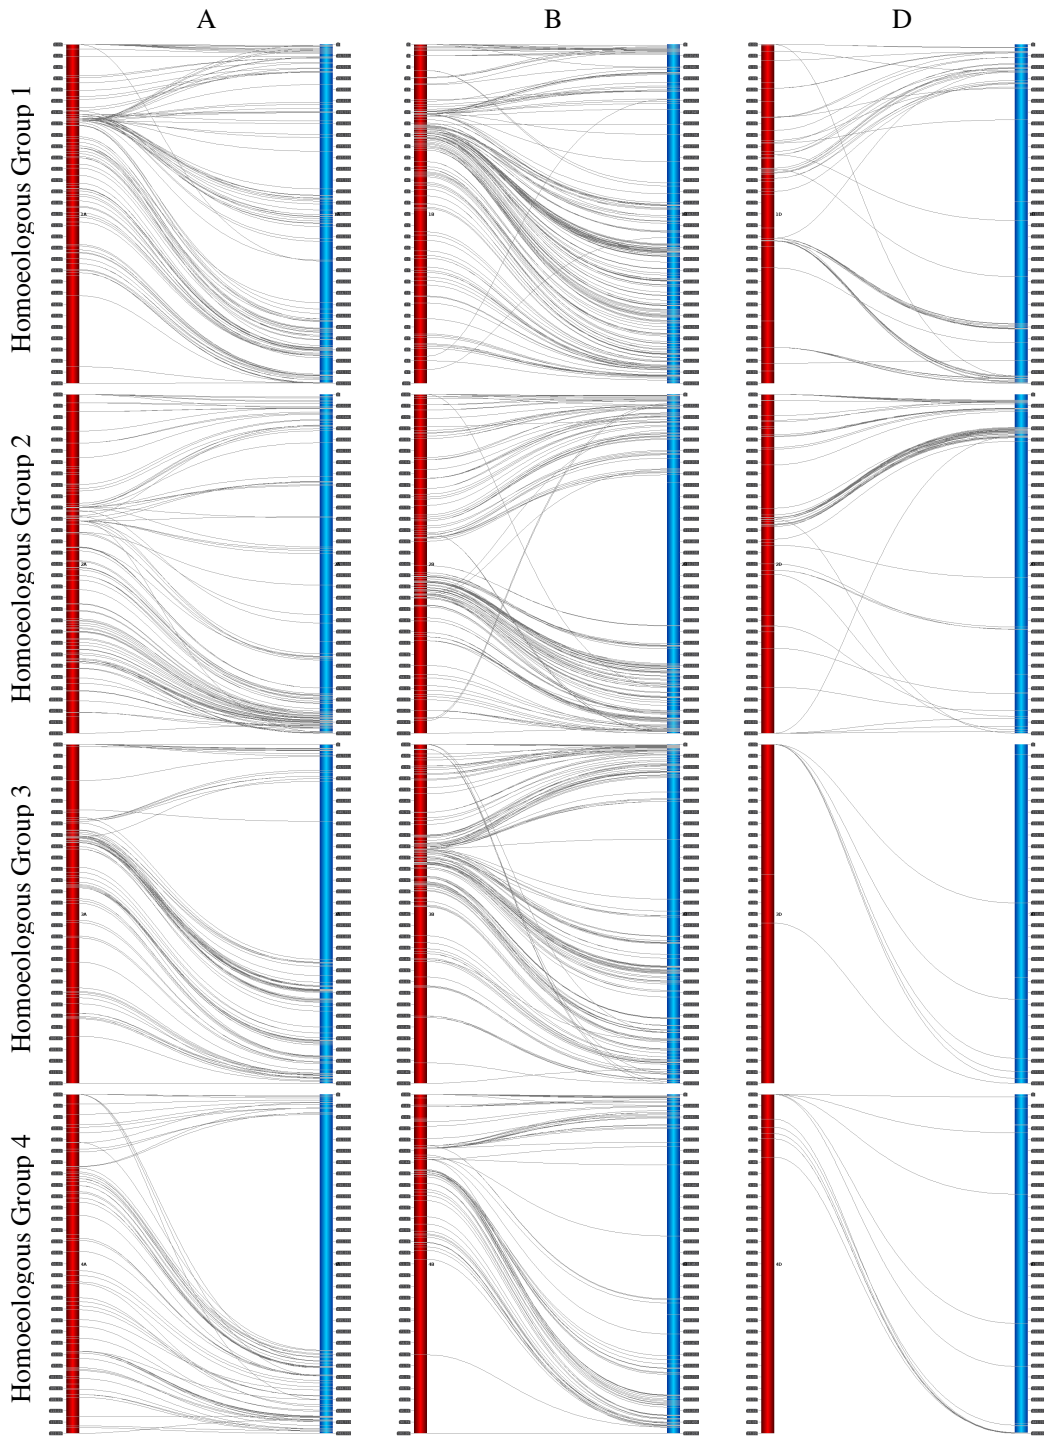

**Figure S 3 The LRC map aligned along the wheat genome assembly.** Alignment of all chromosomes of the LRC map with the respective chromosome of a recent wheat genome assembly. Alignments depicted as Sturde1 plots with vertical bars representing the chromosomes. (LRC: blue, genome assembly: red). Markers shared between chromosomes are connected. Positions of markers are given in gray boxes at the sides of the bars.

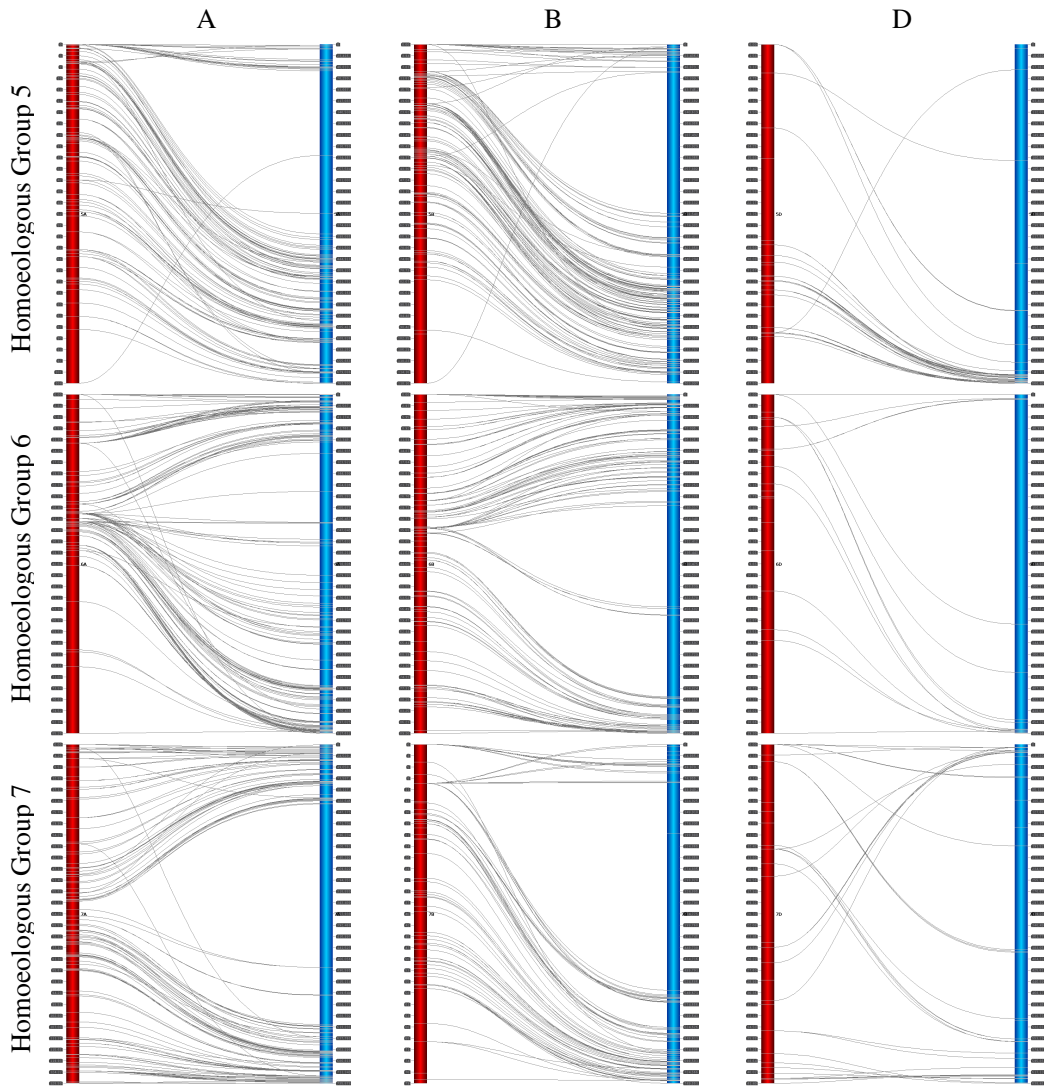

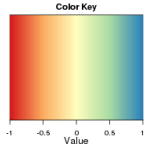

7A

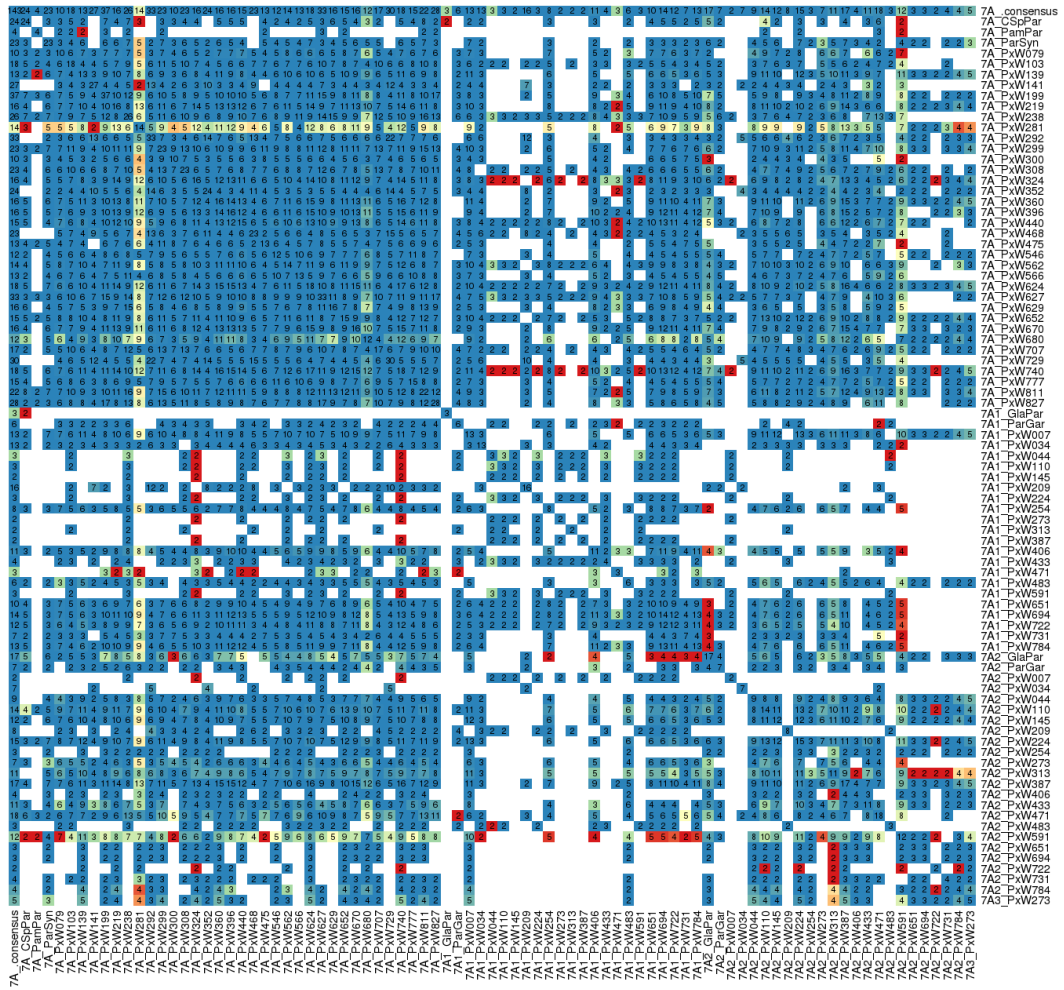

**Figure S 4** Heatmap of the marker order correlation on chromosome 7A. Pair-wise comparisons of the marker order were made between all 60 bi-parental maps and also to the LRC map. Names of the maps are given at the right and below. Heatmap colors reflect the Spearman's rank correlation coefficient  $\rho_s$  in a color gradient from red (strong negative) via yellow (close to zero) to blue (strong positive). The color gradient is given on the top right. The numbers in the colored squares are the numbers of markers in common between the maps compared. Gaps in the matrix are due to not enough common markers.

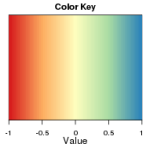

6B

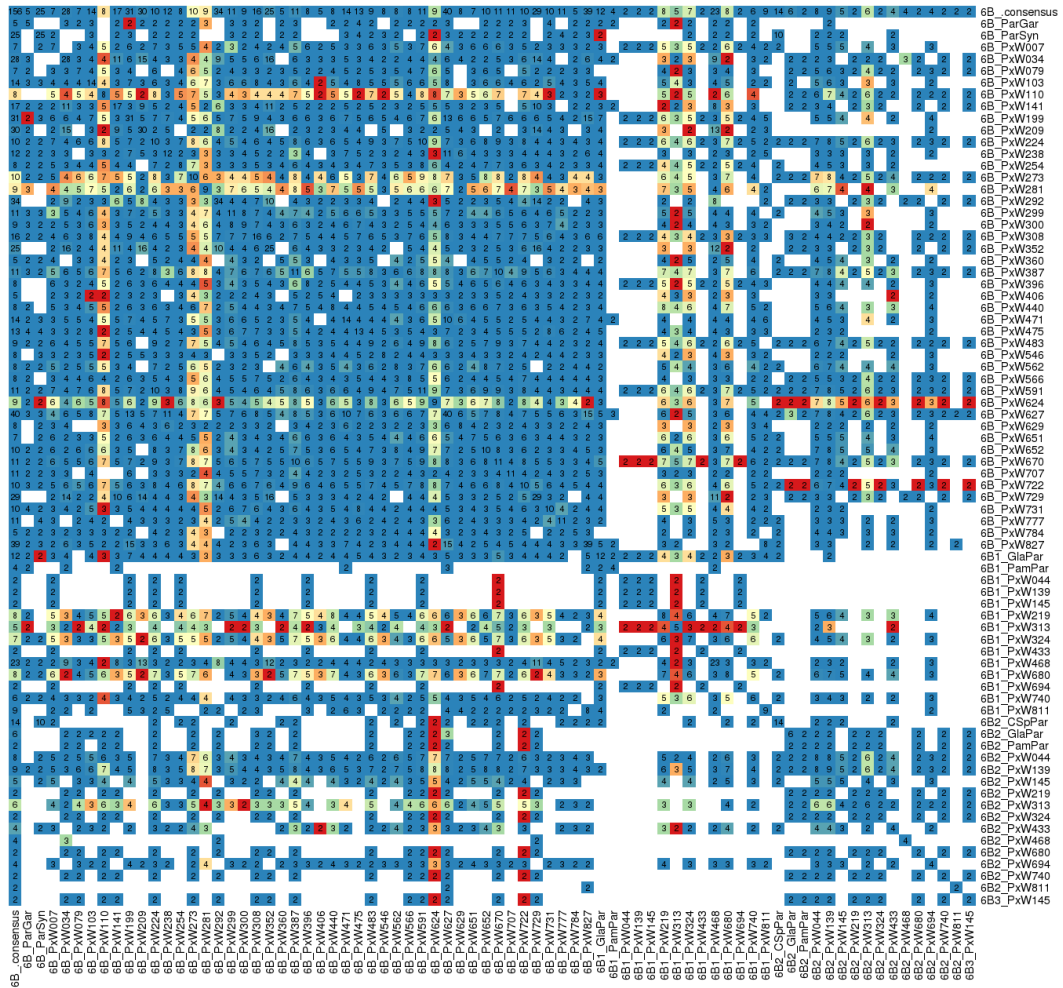

**Figure S 5** Heatmap of the marker order correlation on chromosome 6B. Pair-wise comparisons of the marker order were made between all 60 bi-parental maps and also to the LRC map. Names of the maps are given at the right and below. Heatmap colors reflect the Spearman's rank correlation coefficient  $\rho_s$  in a color gradient from red (strong negative) via yellow (close to zero) to blue (strong positive). The color gradient is given on the top right. The numbers in the colored squares are the numbers of markers in common between the maps compared. Gaps in the matrix are due to not enough common markers.



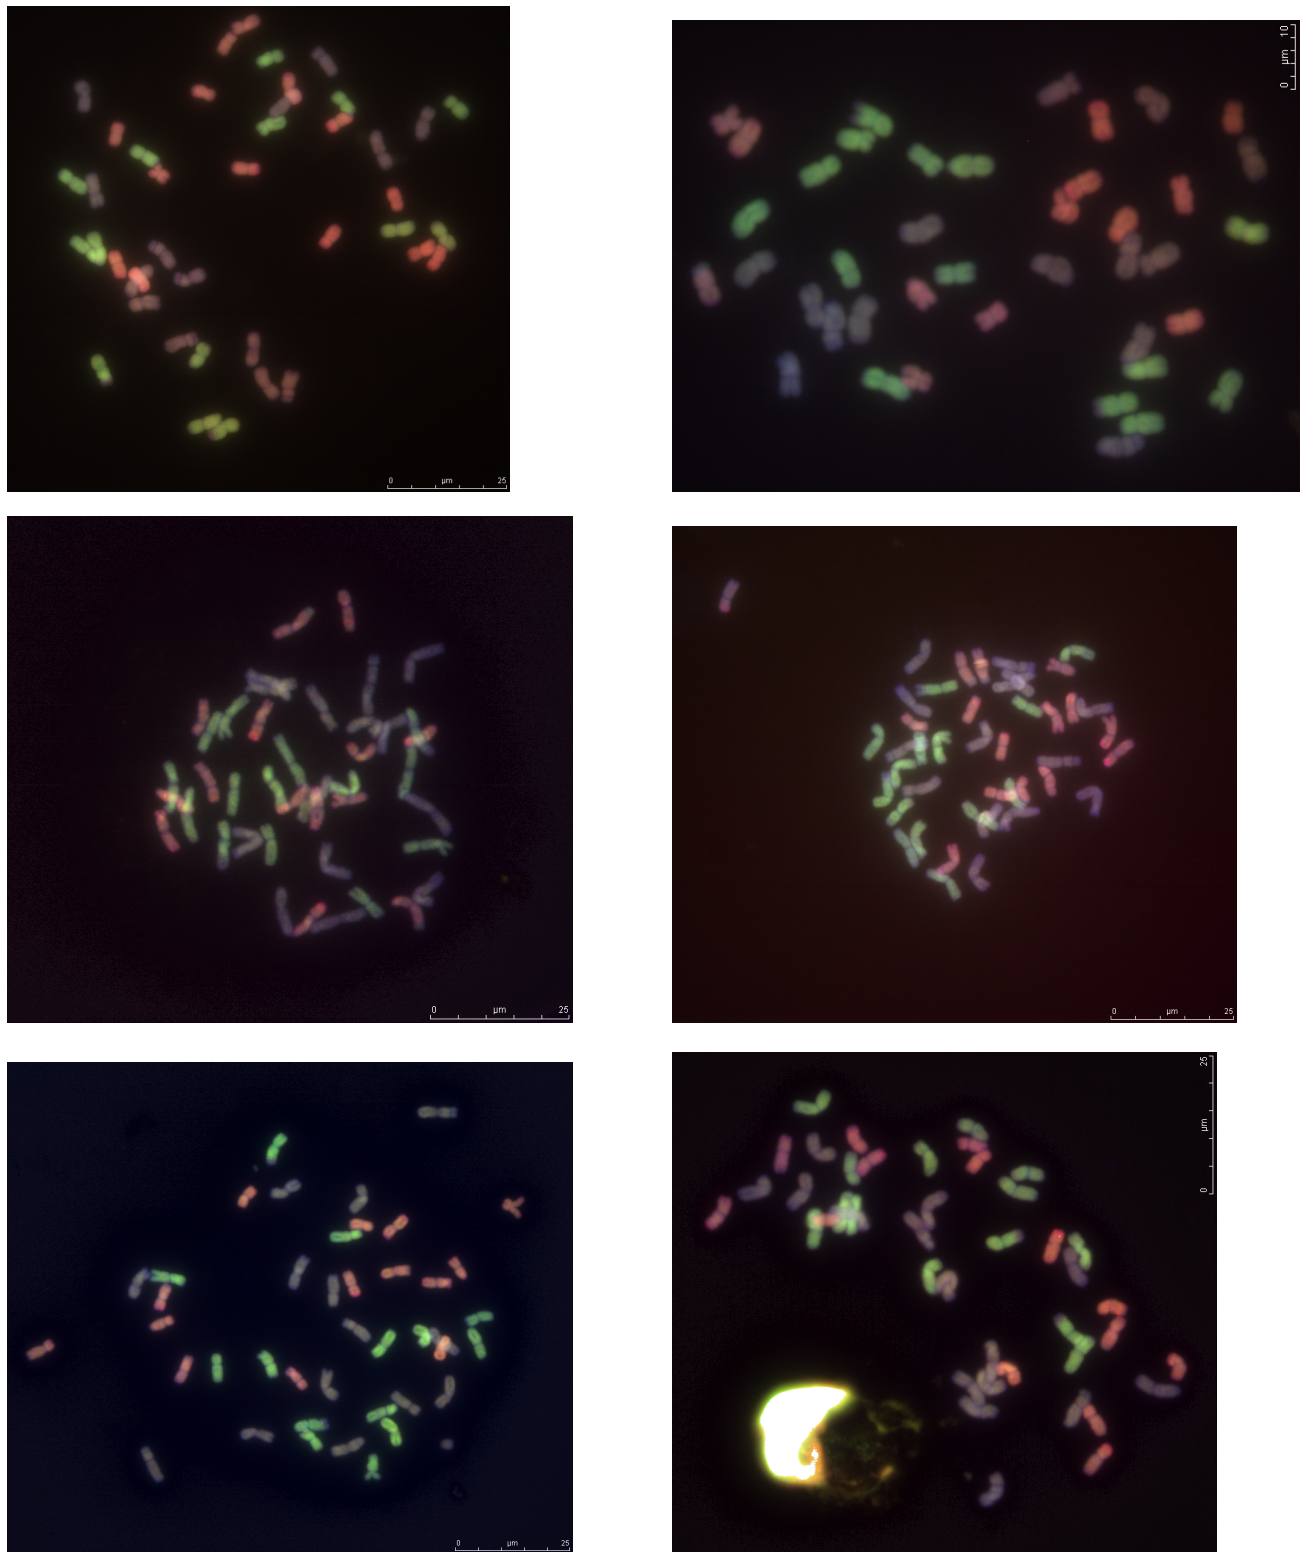

**Figure S 6** Genome *in situ* hybridisation (GISH) performed with accession W103 (top-left), W468 (top-right) W139 (2x middle), W360 (2x bottom).

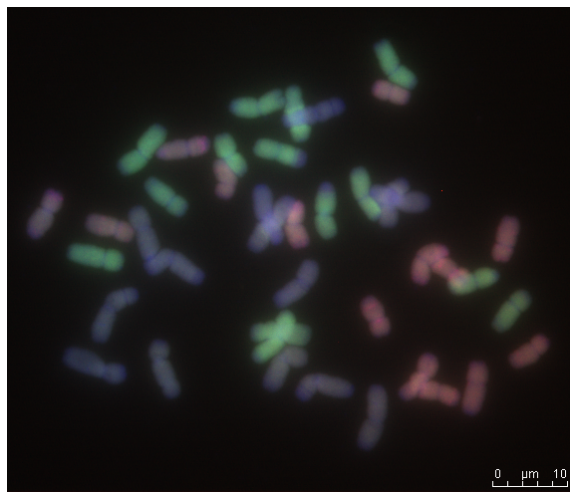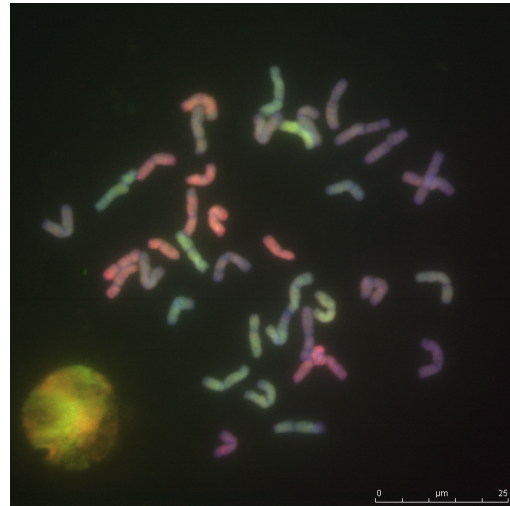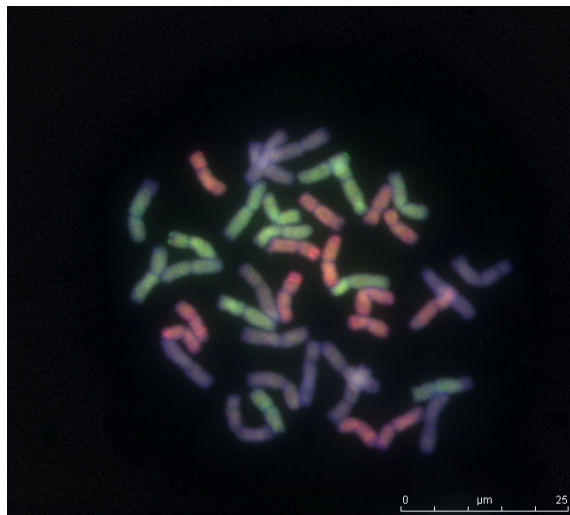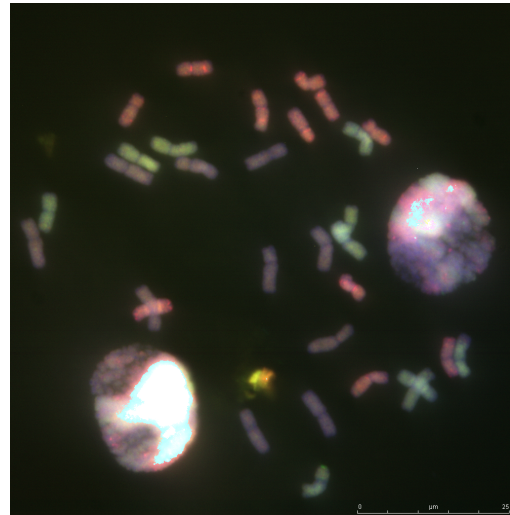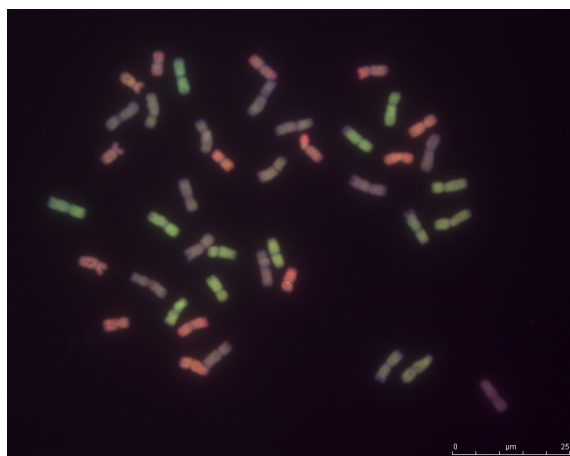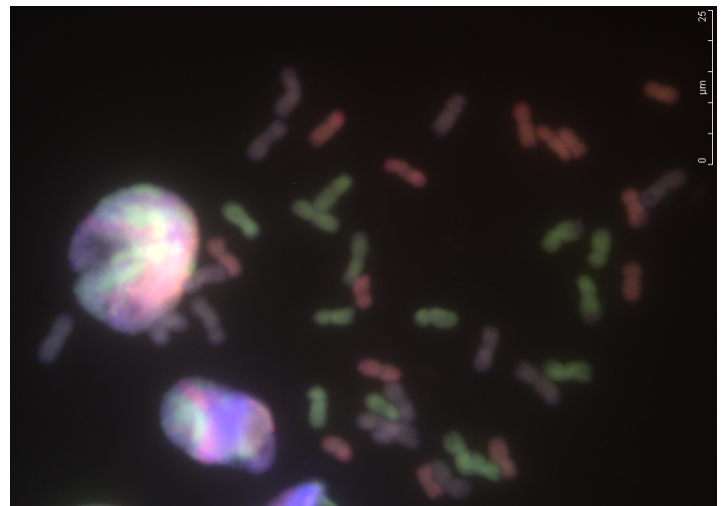

**Figure S 7** Genome *in situ* hybridisation (GISH) performed with accession W546 (top-left), W624 (top-right), W680 (middle 2x), W740 (bottom-left), W827 (bottom-right).

**Figure S 8 Segregation distortion aligned along the LRC map chromosomes.** Chromosomes are depicted as bold black vertical bar underneath their name. Marker positions are indicated by thin black horizontal lines, crossing the chromosome. Putative centromere regions are highlighted in red on the chromosome. Population names are listed on top in alpha-numerical order starting on the left side of the chromosome bar. Each population is depicted in a separate color, color codes are given at the end of the consensus map. Segregation distortion for a marker is depicted as a short line underneath the population name, at the same height as the marker position on the LRC map. Significant levels for segregation distortion is coded as line width, the smaller the significant level, the wider the line. Segregation distorted markers are only included if the p-value was below 0.05 (adjusted for multiple testing).

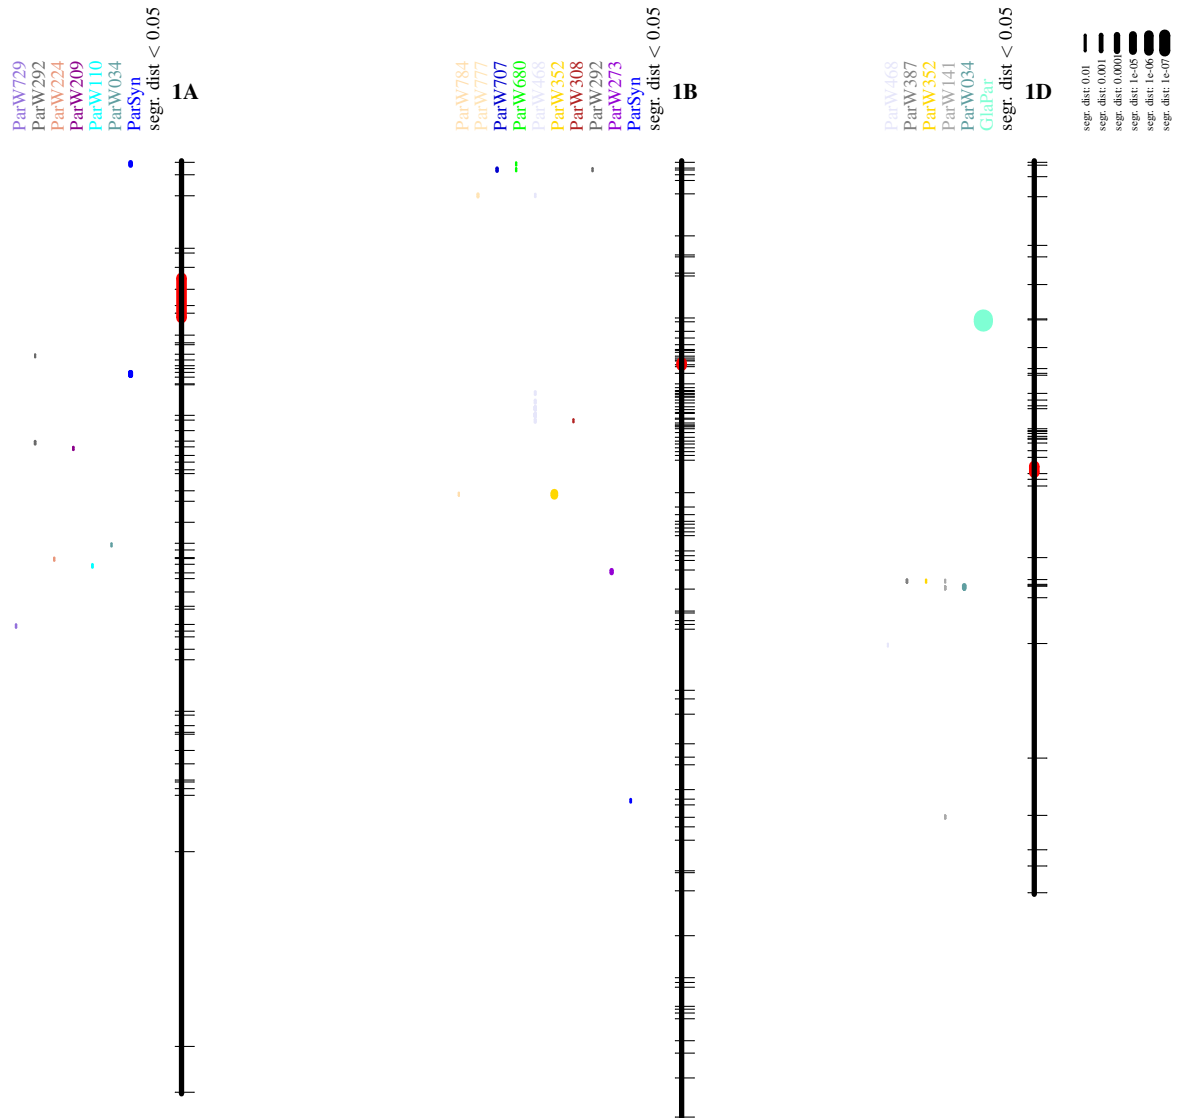

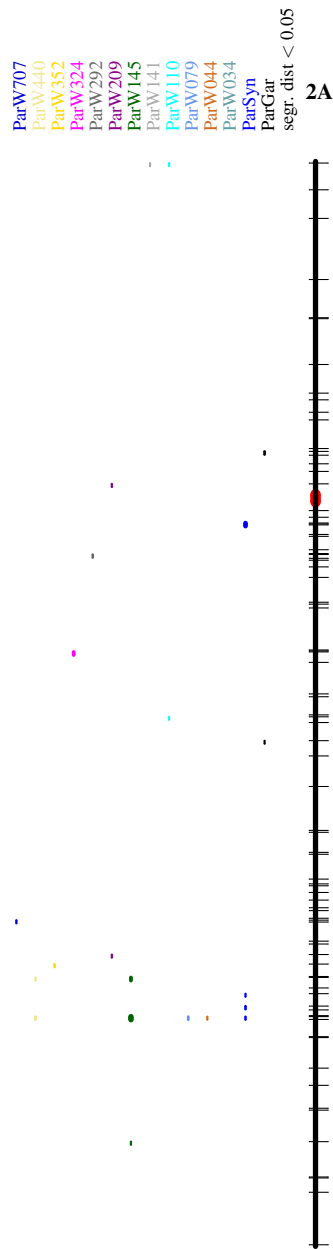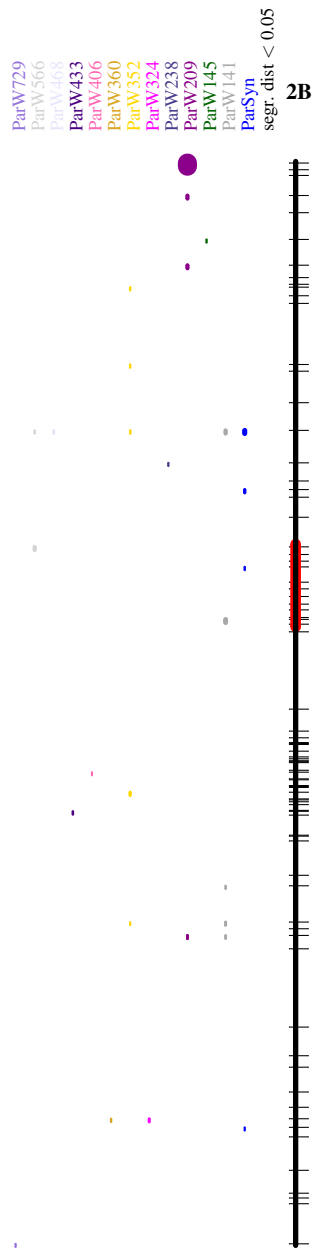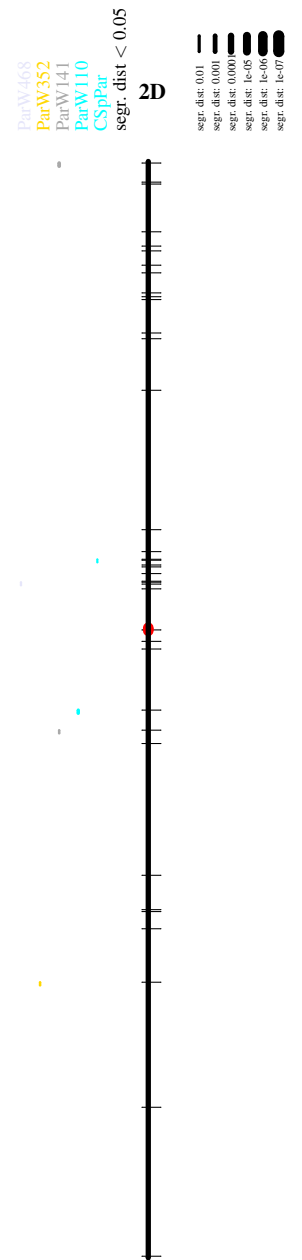

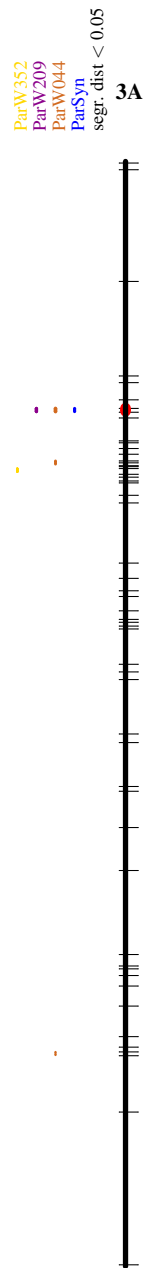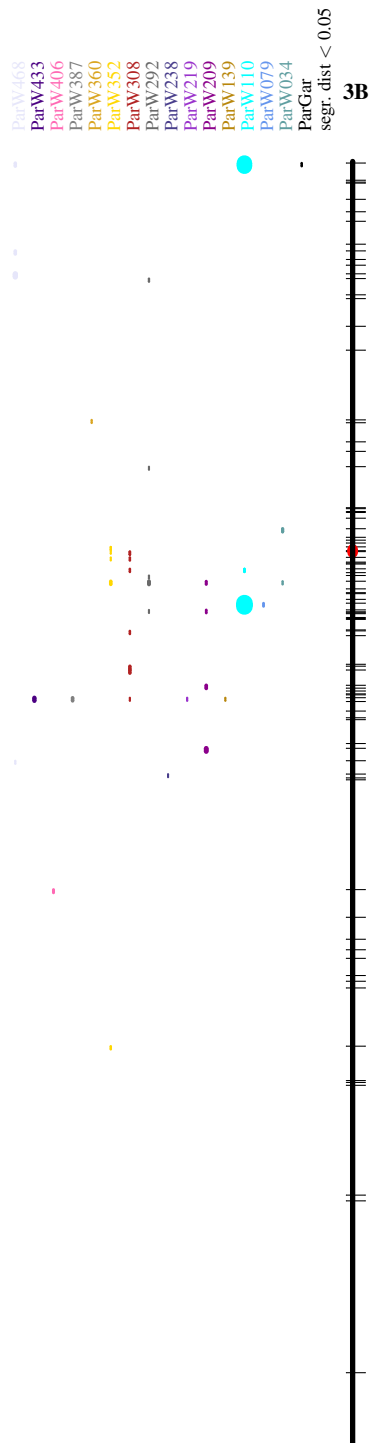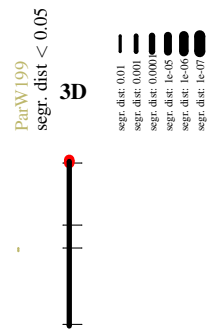

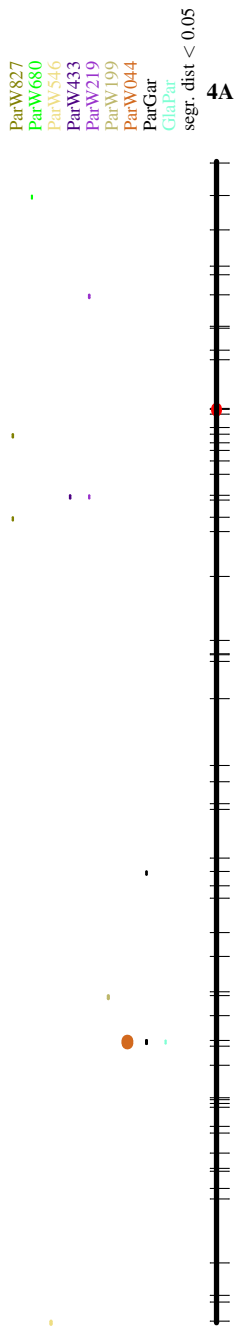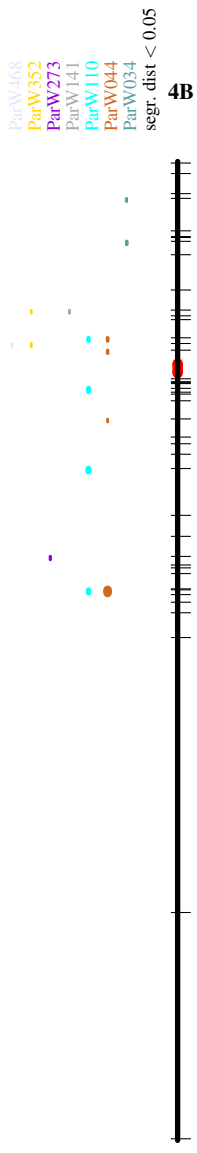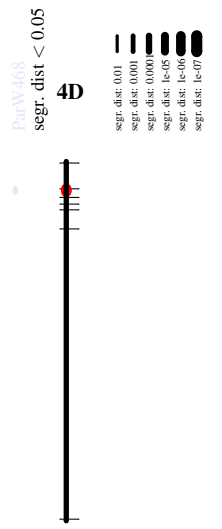

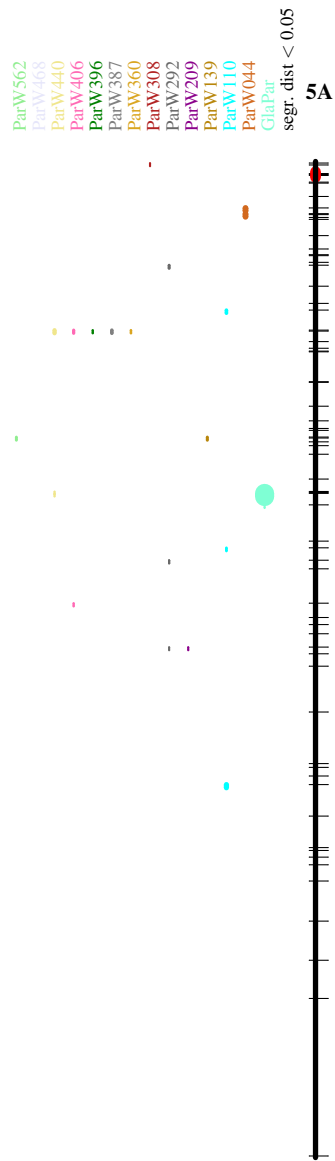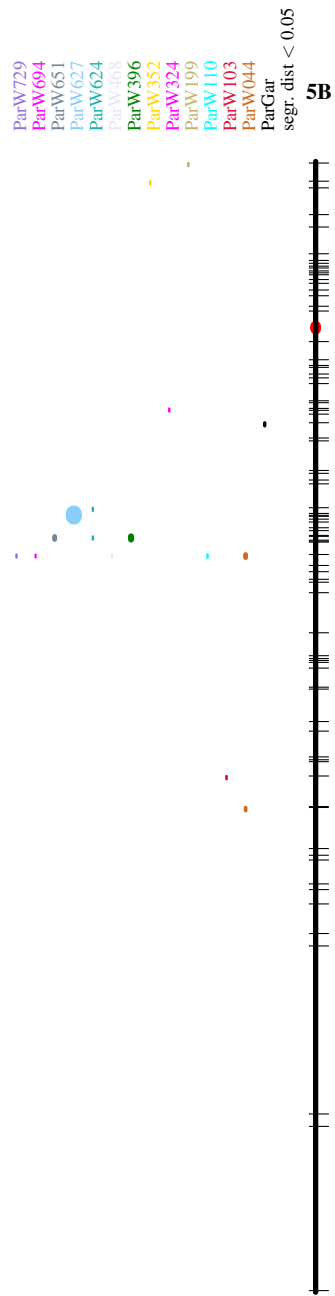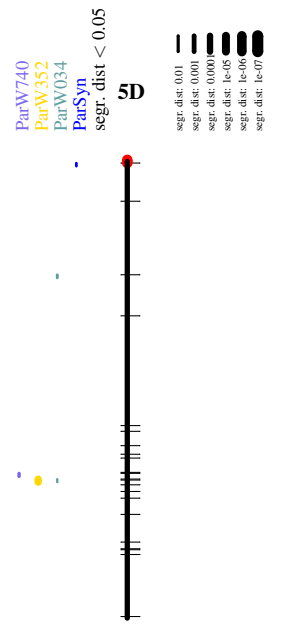

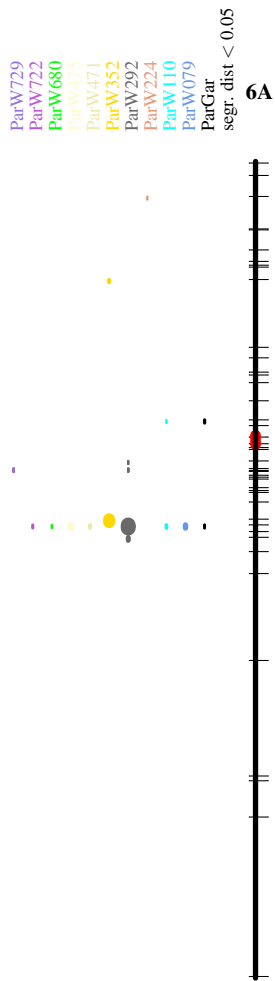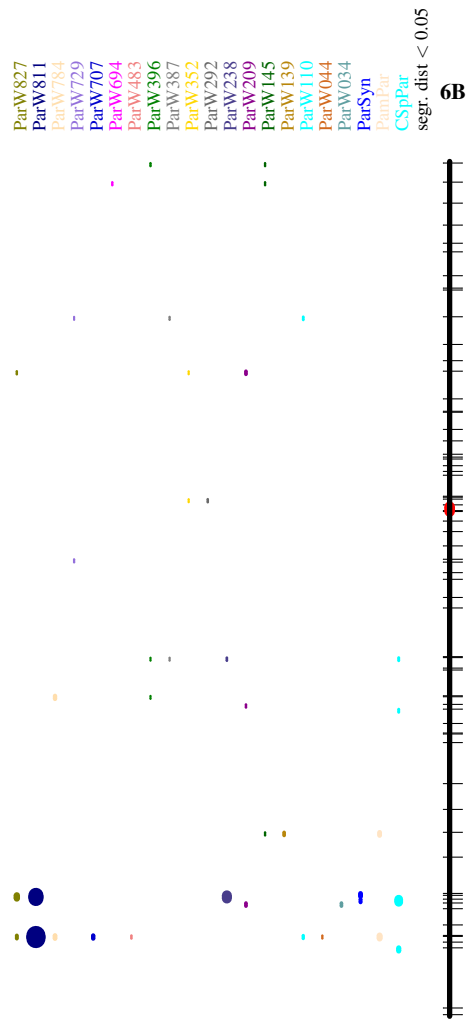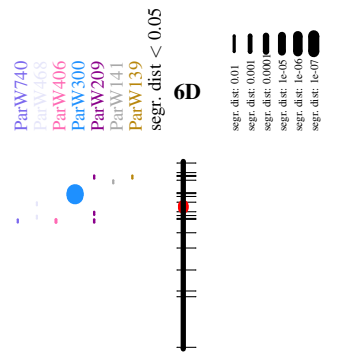



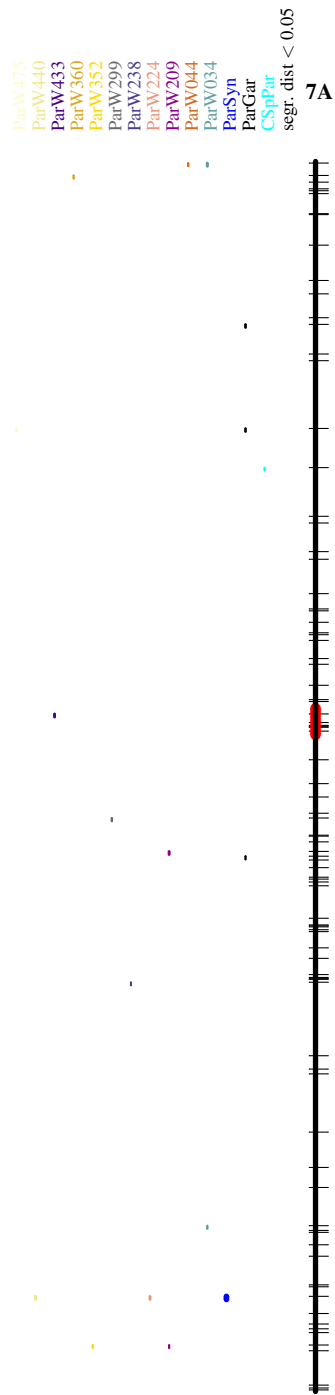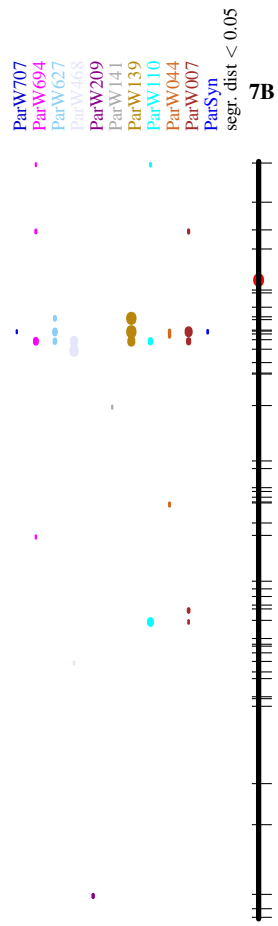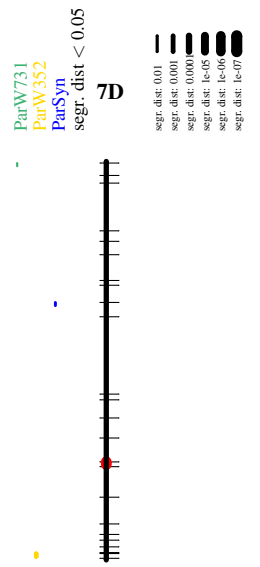

- CSpPar:  Aqua
- GlafPar:  Aquamarine
- PamPar:  Bisque
- ParGar:  Black
- ParSyn:  Blue
- ParW007:  Brown
- ParW034:  CadetBlue
- ParW044:  Chocolate
- ParW079:  CornflowerBlue
- ParW103:  Crimson
- ParW110:  Cyan
- ParW139:  DarkGoldenrod
- ParW141:  DarkGray
- ParW145:  DarkGreen
- ParW199:  DarkKhaki
- ParW209:  DarkMagenta
- ParW219:  DarkOrchid
- ParW224:  DarkSalmon
- ParW238:  DarkSlateBlue
- ParW254:  DarkTurquoise
- ParW273:  DarkViolet
- ParW281:  DeepPink
- ParW292:  DimGray
- ParW299:  DimGrey
- ParW300:  DodgerBlue
- ParW308:  FireBrick
- ParW313:  ForestGreen
- ParW324:  Fuchsia
- ParW352:  Gold
- ParW360:  Goldenrod
- ParW387:  Gray
- ParW396:  Green
- ParW406:  HotPink
- ParW433:  Indigo
- ParW440:  Khaki
- ParW468:  Lavender
- ParW471:  PaleGoldenrod
- ParW475:  LemonChiffon
- ParW483:  LightCoral
- ParW546:  LightGoldenrod
- ParW562:  LightGreen
- ParW566:  LightGrey
- ParW591:  LightSalmon
- ParW624:  LightSeaGreen
- ParW627:  LightSkyBlue
- ParW629:  LightSlateBlue
- ParW651:  LightSlateGray
- ParW652:  LightSlateGrey
- ParW670:  LightSteelBlue
- ParW680:  Lime
- ParW694:  Magenta
- ParW707:  MediumBlue
- ParW722:  MediumOrchid
- ParW729:  MediumPurple
- ParW731:  MediumSeaGreen
- ParW740:  MediumSlateBlue
- ParW777:  Moccasin
- ParW784:  NavajoWhite
- ParW811:  Navy
- ParW827:  Olive
- pop:  BlueViolet



**Figure S 9 Translocation of markers of different populations aligned along the LRC map.** Chromosomes are depicted as bold black vertical bar underneath their name. Marker positions are indicated by thin black horizontal lines, crossing the chromosome. Putative centromere regions are highlighted in red on the chromosome. Names of populations with translocation are listed on top in alpha-numerical order starting on the left side of the chromosome bar. Each population is depicted in a separate color, color codes are given at the end of the consensus map. Translocations are depicted as vertical colored dots underneath the population name, at the height of the marker positions on the consensus chromosome. LOD scores levels are coded as line widths, the larger the score, the wider the line. Markers linked to a translocated marker are connected by thin vertical lines. Translocations are only shown if the linkage LOD score was above 10.

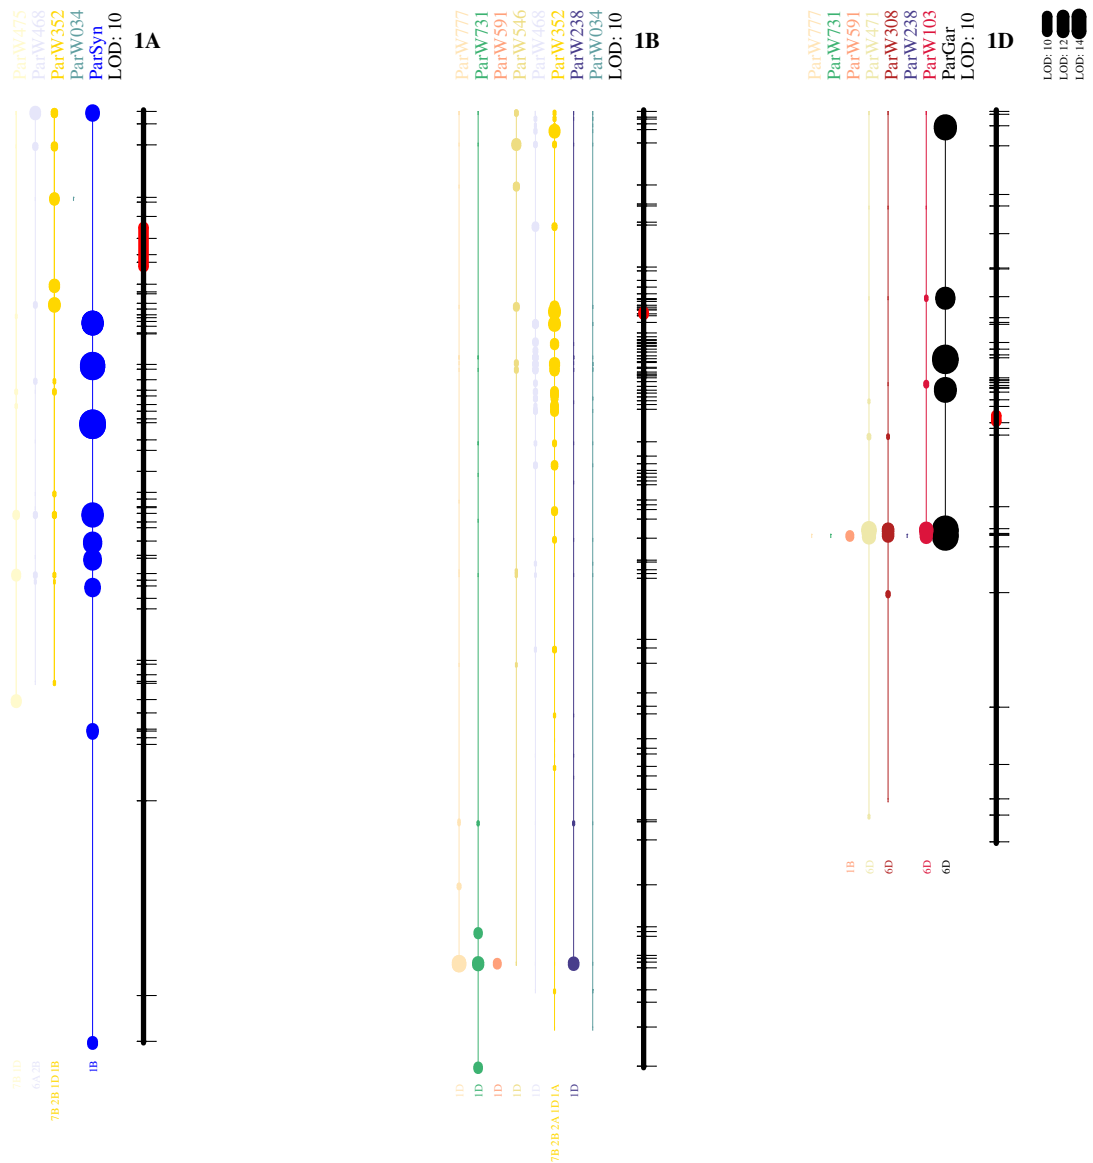

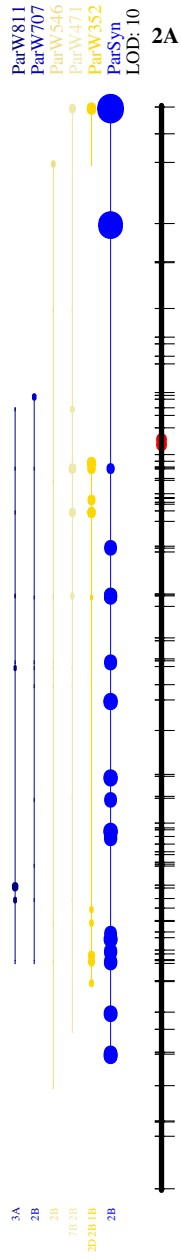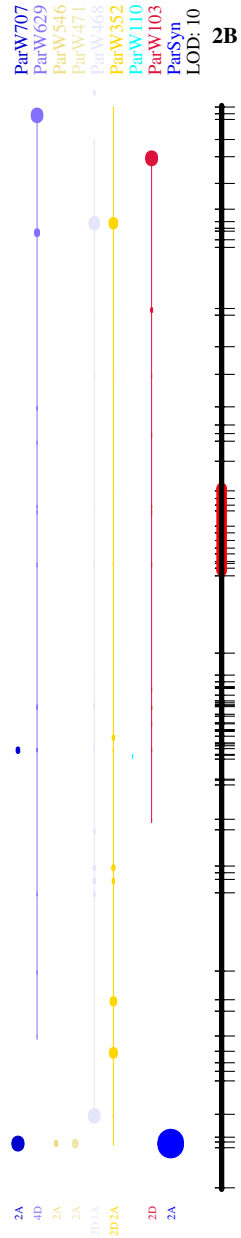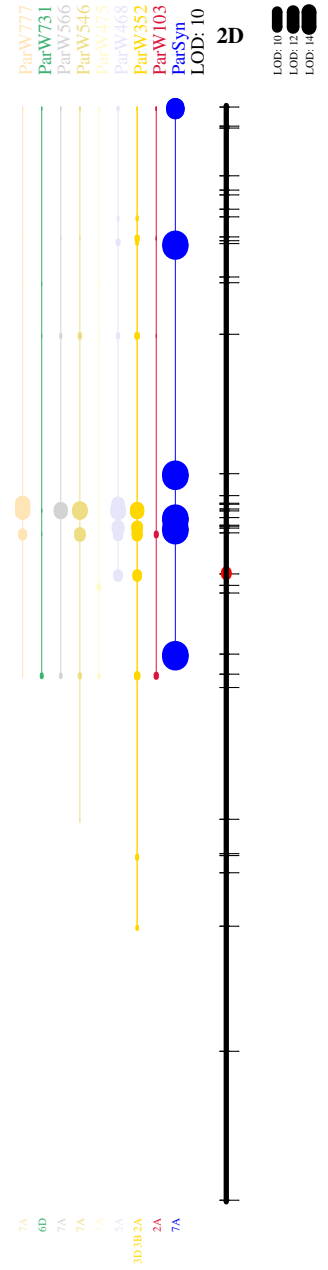

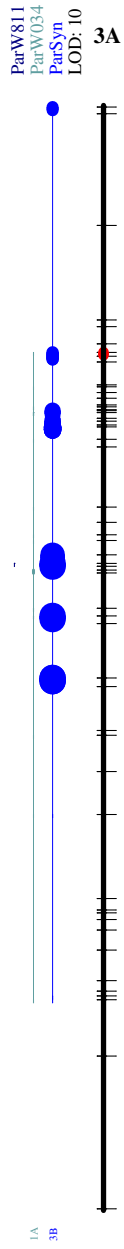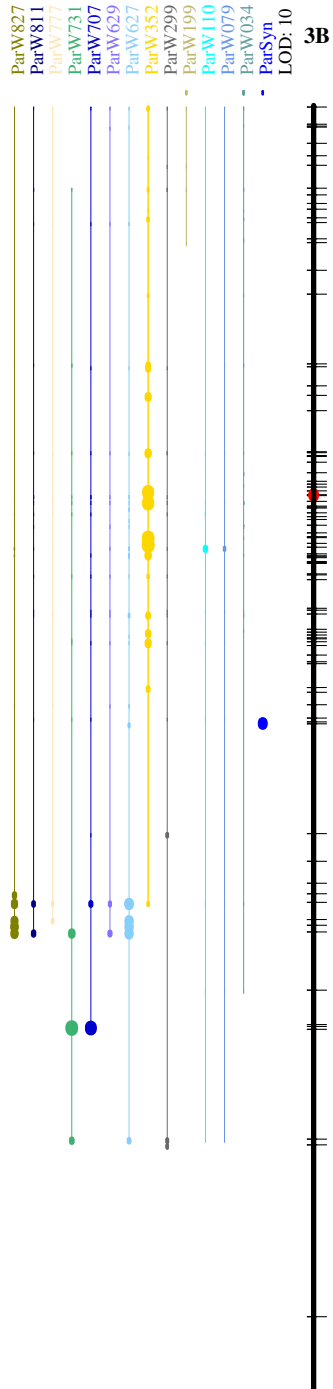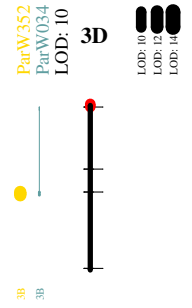

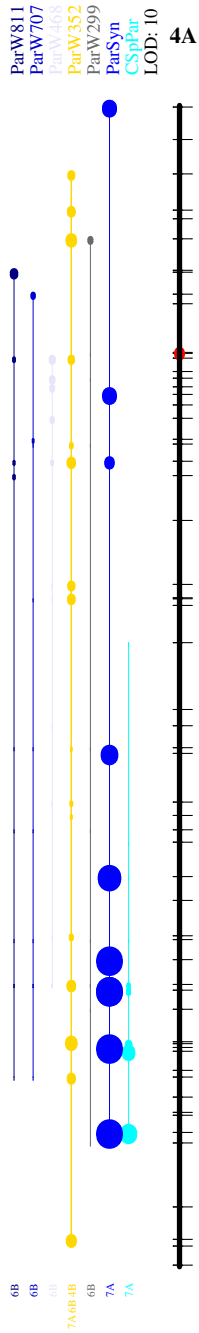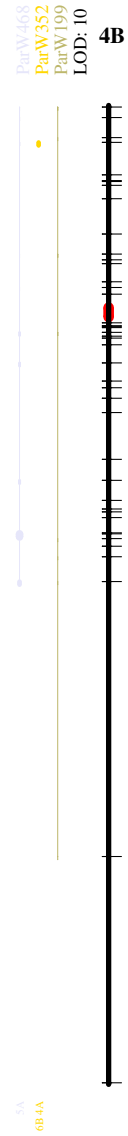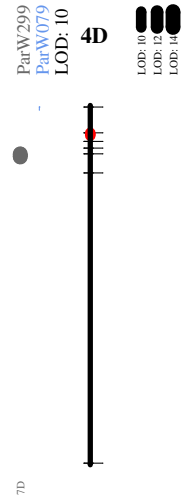

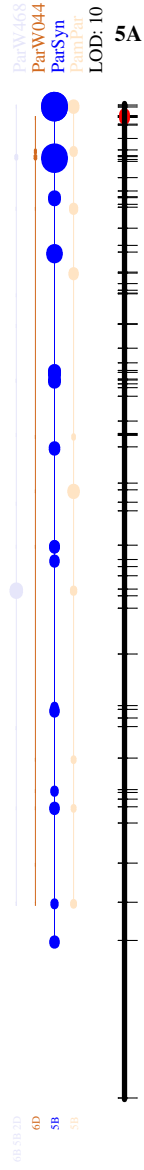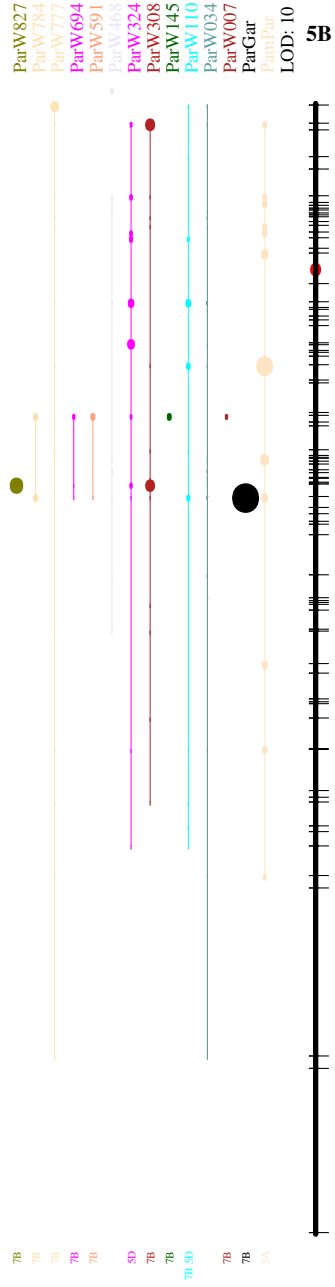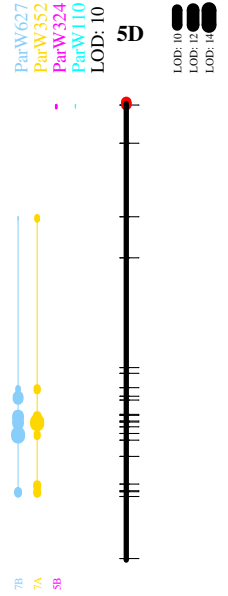



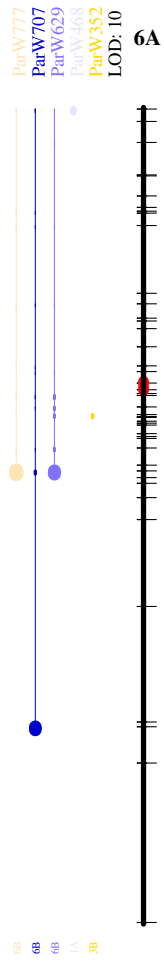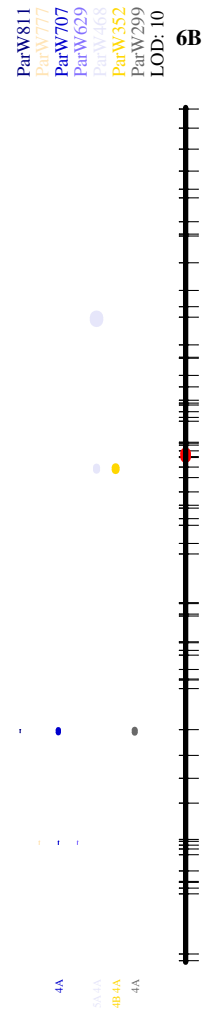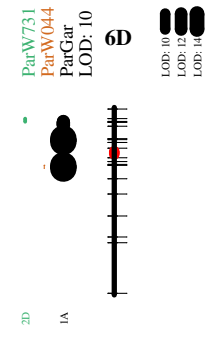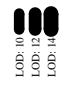

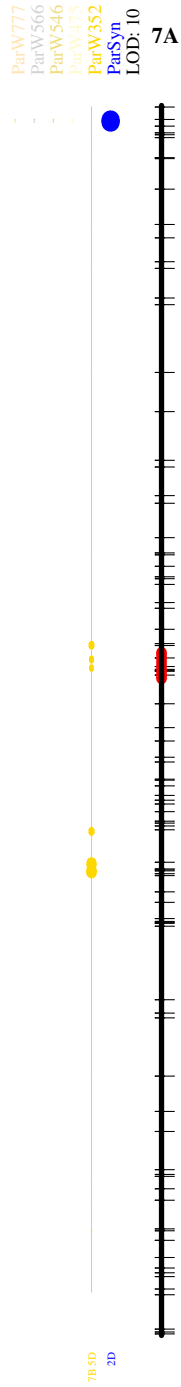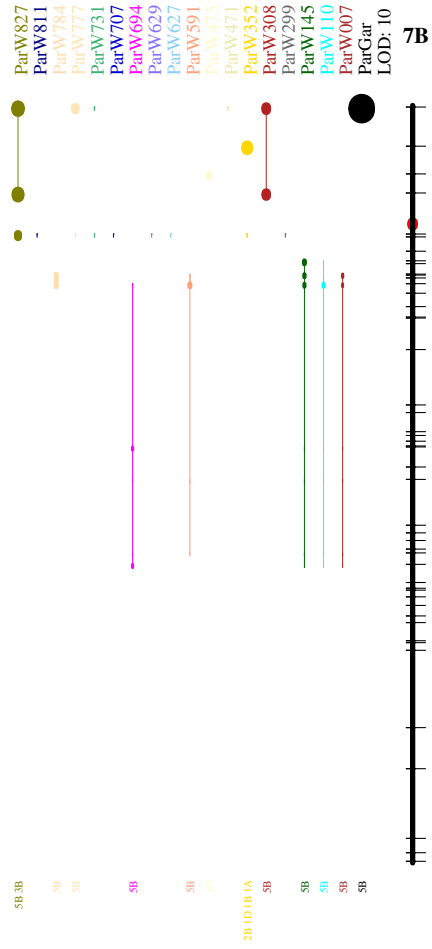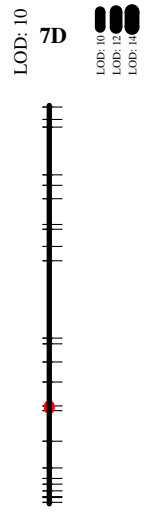

- CSpPar: Aqua
- GliaPar: Aquamarine
- PamPar: Bisque
- ParGar: Black
- ParSyn: Blue
- ParW007: Brown
- ParW034: CadetBlue
- ParW044: Chocolate
- ParW079: CornflowerBlue
- ParW103: Crimson
- ParW110: Cyan
- ParW139: DarkGoldenrod
- ParW141: DarkGray
- ParW145: DarkGreen
- ParW199: DarkKhaki
- ParW209: DarkMagenta
- ParW219: DarkOrchid
- ParW224: DarkSalmon
- ParW238: DarkSlateBlue
- ParW254: DarkTurquoise
- ParW273: DarkViolet
- ParW281: DeepPink
- ParW292: DimGray
- ParW299: DimGrey
- ParW300: DodgerBlue
- ParW308: FireBrick
- ParW313: ForestGreen
- ParW324: Fuchsia
- ParW352: Gold
- ParW360: Goldenrod
- ParW387: Gray
- ParW396: Green
- ParW406: HotPink
- ParW433: Indigo
- ParW440: Khaki
- ParW468: Lavender
- ParW471: PaleGoldenrod
- ParW475: LemonChiffon
- ParW483: LightCoral
- ParW546: LightGoldenrod
- ParW562: LightGreen
- ParW566: LightGrey
- ParW591: LightSalmon
- ParW624: LightSeaGreen
- ParW627: LightSkyBlue
- ParW629: LightSlateBlue
- ParW651: LightSlateGray
- ParW652: LightSlateGrey
- ParW670: LightSteelBlue
- ParW680: Lime
- ParW694: Magenta
- ParW707: MediumBlue
- ParW722: MediumOrchid
- ParW729: MediumPurple
- ParW731: MediumSeaGreen
- ParW740: MediumSlateBlue
- ParW777: Moccasin
- ParW784: NavajoWhite
- ParW811: Navy
- ParW827: Olive

**Figure S 10 Crossover QTL aligned along the LRC map chromosomes.** Chromosomes are depicted as bold black vertical bar underneath their name. Marker positions are indicated by thin black horizontal lines, crossing the chromosome. Putative centromere regions are highlighted in red on the chromosome. Names of populations with QTL equal or above a LOD score of 2.0 on that chromosome are listed on top in alpha-numerical order starting on the left side of the chromosome bar. The QTL positions are depicted as a red or blue horizontal bar underneath the population name. Black dots give the location of the confidence interval bordering markers on the population map. The dashed purple vertical line indicates the extend of the confidence interval. The line is given as dotted line, if the bordering markers are located further away on the consensus map than in the population map. The additive effect of the QTL (in number of crossover) is listed behind the population name. QTL and additive effect are given in blue if the effect is on the A parent and in red if the effect is on the B parent. Abbreviations: add = additive effect, XO = crossover trait.

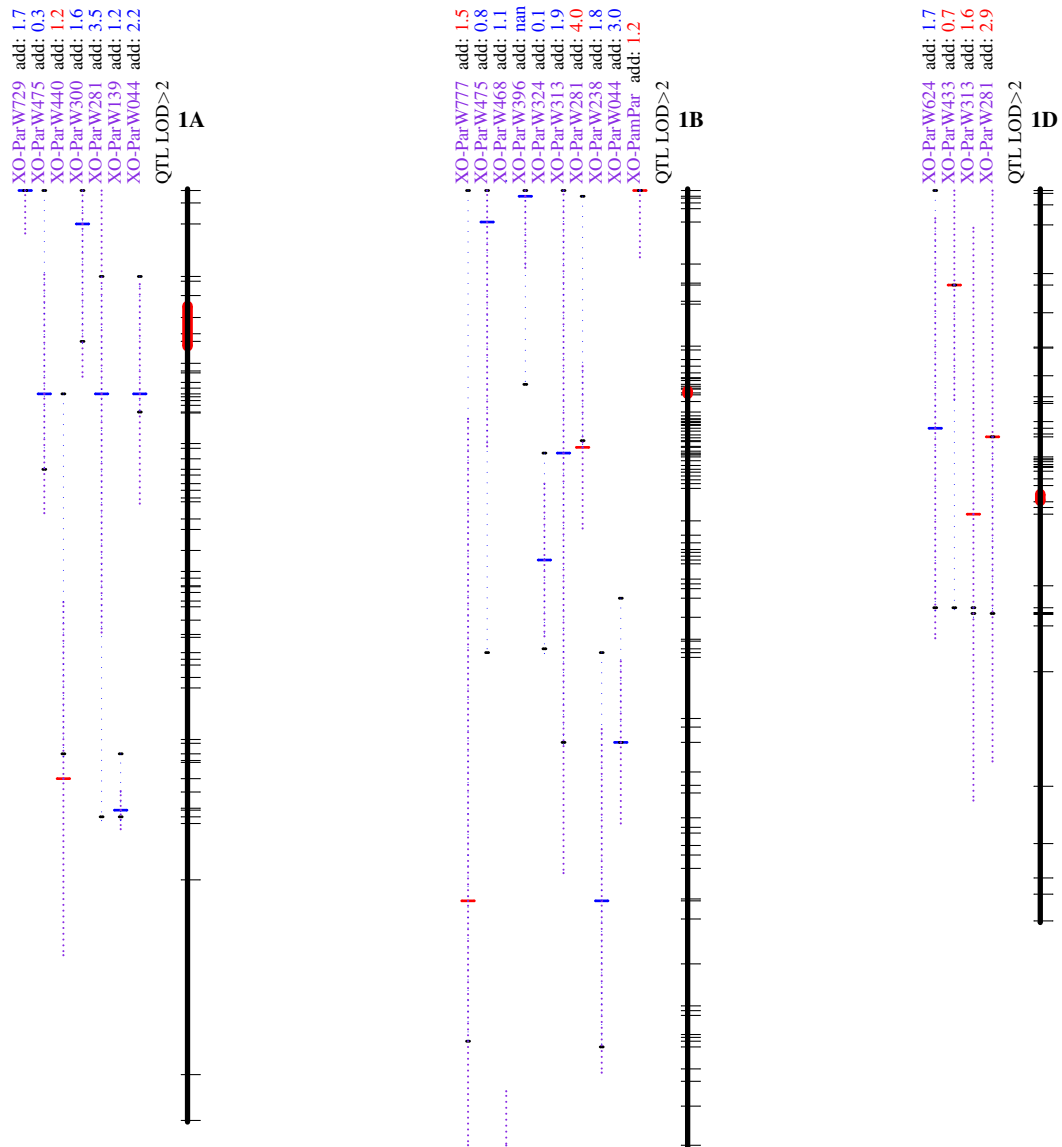

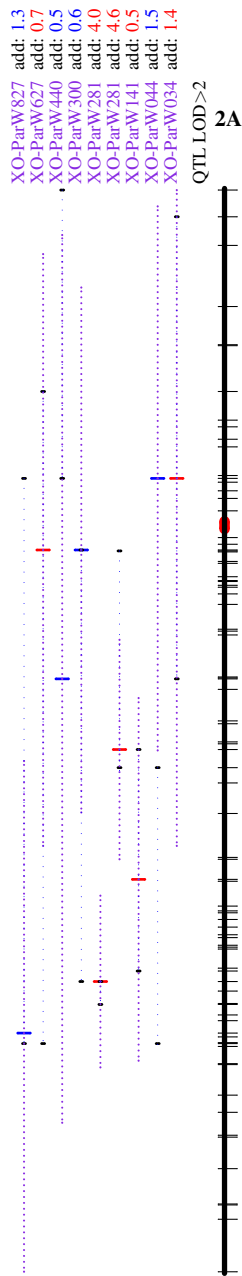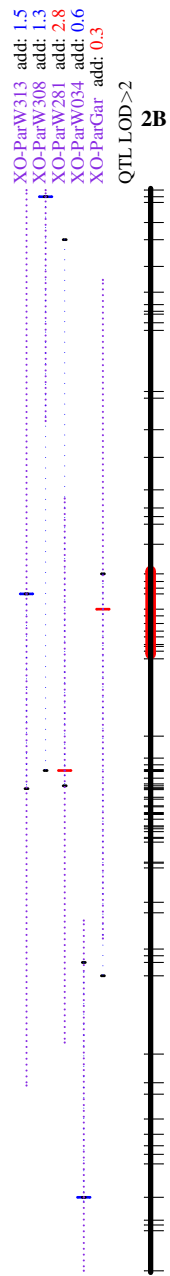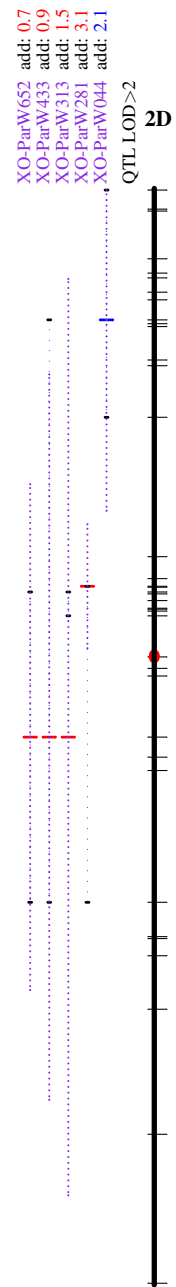

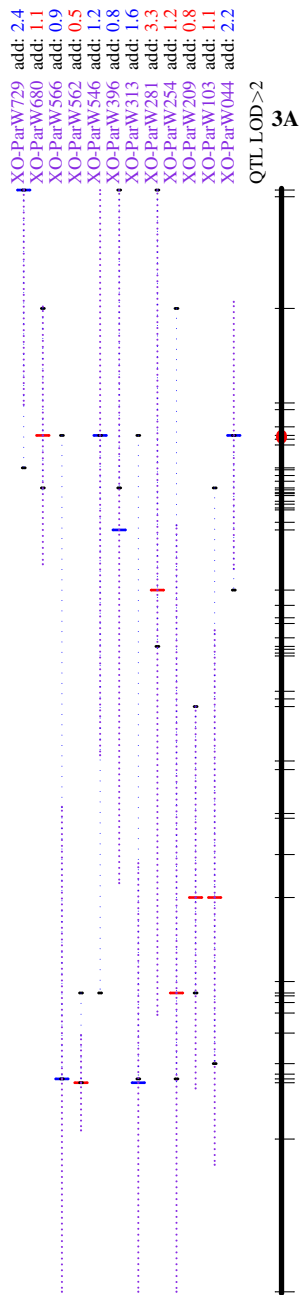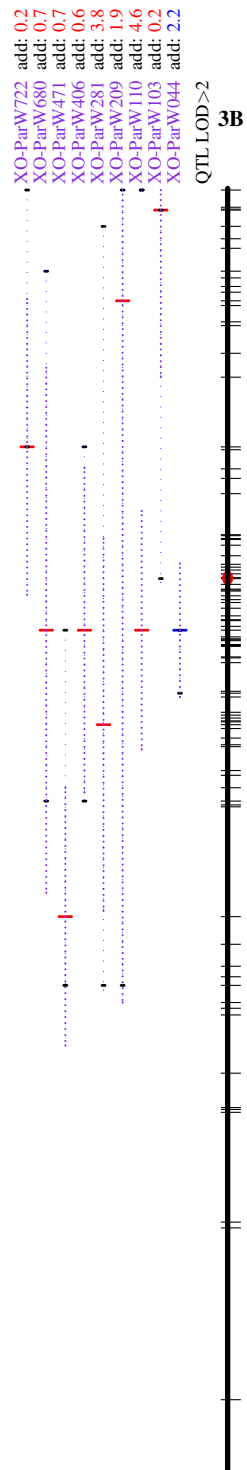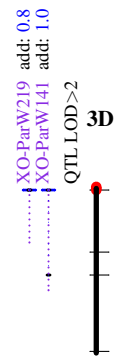

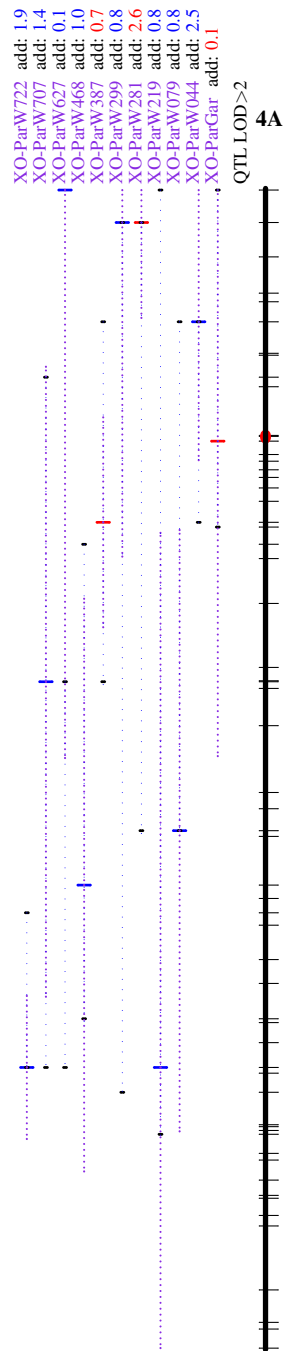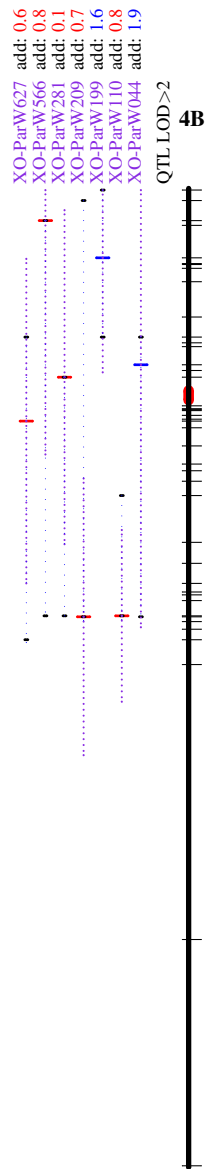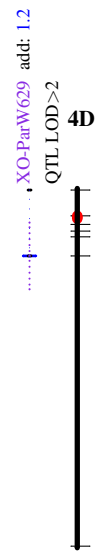

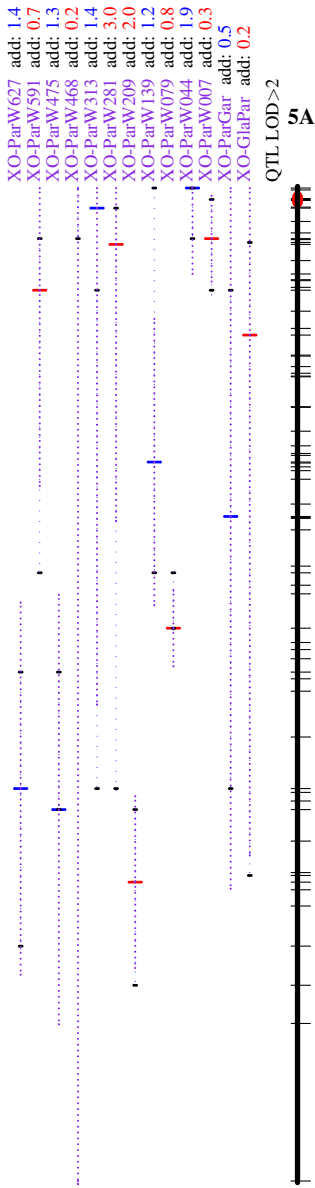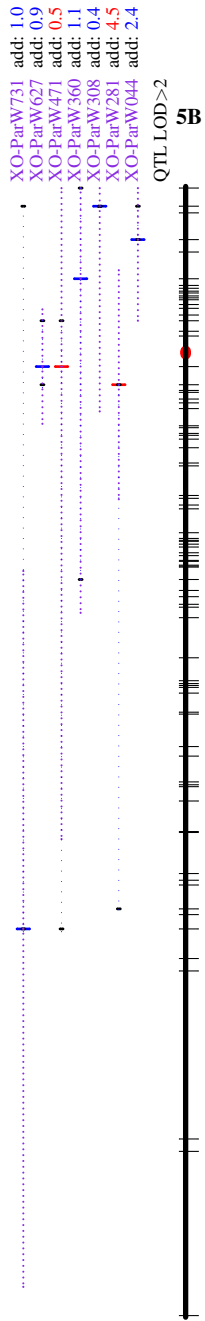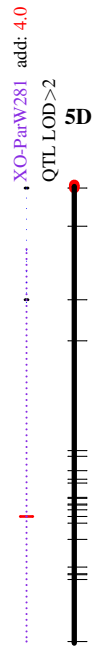



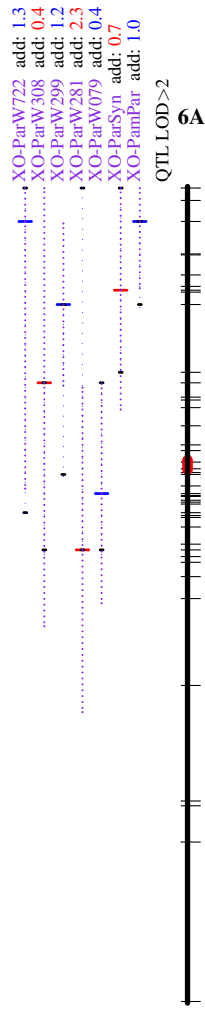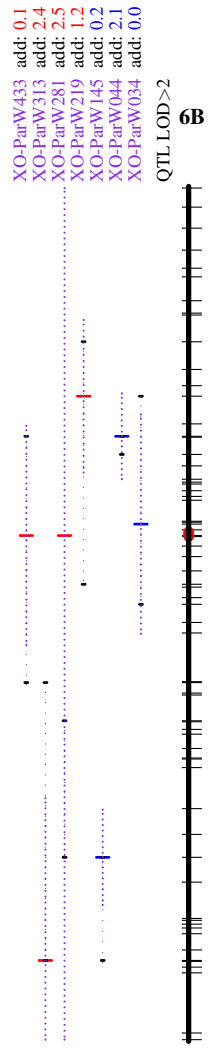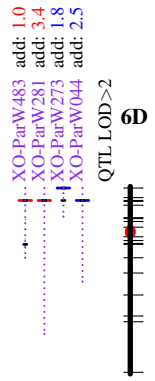

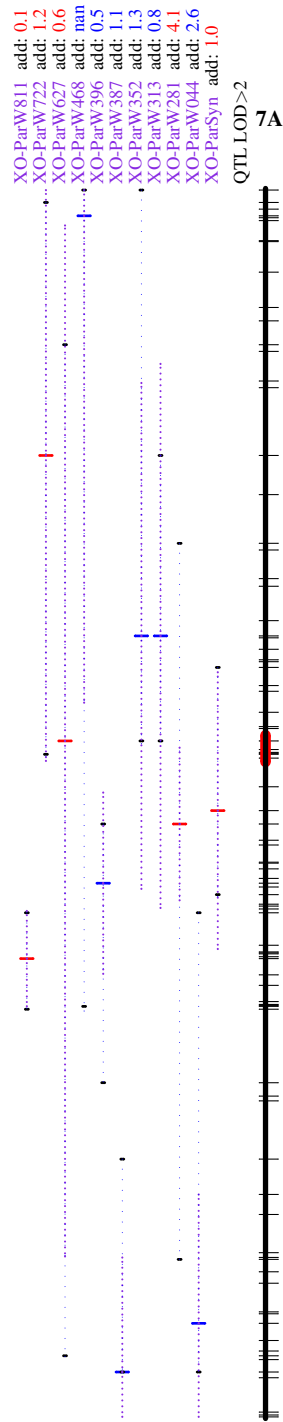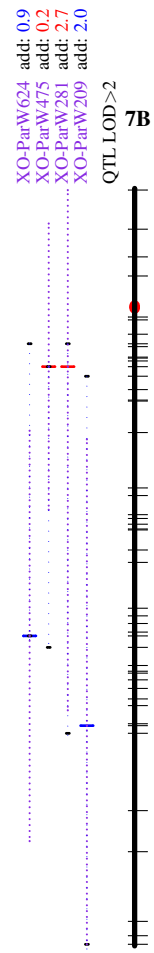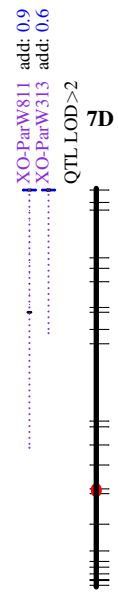

**Main Figure 1 List of Populations .**
